# Supplementary material for: Safety and efficacy outcomes of double vs. triple antithrombotic therapy in patients with atrial fibrillation following percutaneous coronary intervention: a systematic review and meta-analysis of non-vitamin K antagonist oral anticoagulant-based randomized clinical trials
Source: Oxford University Press journal article supplement (doi:10.1093/eurheartj/ehz732), 2019-10-03

**Safety and efficacy outcomes of double versus triple antithrombotic therapy in patients with atrial fibrillation following percutaneous coronary intervention: a systematic review and meta-analysis of randomized clinical trials**

Giuseppe Gargiulo*, MD, PhD, Andreas Goette*, MD, PhD, Jan Tijssen, PhD, Lars Eckardt, MD, Thorsten Lewalter, MD, Pascal Vranckx#, MD, PhD, Marco Valgimigli#, MD, PhD.

**SUPPLEMENTARY APPENDIX**

**Supplementary Table 1. Main characteristics of the 4 included randomized clinical trials.**

**Supplementary Table 2. Baseline characteristics of patients enrolled in the 4 included trials.**

**Supplementary Table 3. Risk of bias of individual studies by Cochrane risk assessment tool.**

**Supplementary Table 4. Leave-one-out sensitivity analysis of the primary bleeding endpoint.**

**Supplementary Table 5. Risk Ratios estimated through a fixed-effect model.**

**Supplementary Table 6. Number needed to treat for benefit or harm in DAT vs TAT.**

**Supplementary Table 7. NNTB and NNTH with their differences according to various risks of ISTH major bleeding and myocardial infarction.**

**Supplementary Figure 1. Flow-chart.**

**Supplementary Figure 2. Secondary bleeding endpoints in DAT vs TAT.**

**Supplementary Figure 3. Secondary bleeding endpoints in NOAC-based DAT vs VKA-based TAT.**

**Supplementary Figure 4. ISTH major or clinically relevant nonmajor bleeding in DAT vs TAT and in NOAC-based DAT vs VKA-based TAT according to dabigatran doses.**

**Supplementary Figure 5. ISTH major bleeding in DAT vs TAT and in NOAC-based DAT vs VKA-based TAT according to dabigatran doses.**

**Supplementary Figure 6. Clinically relevant nonmajor bleeding in DAT vs TAT and in NOAC-based DAT vs VKA-based TAT according to dabigatran doses.**

**Supplementary Figure 7. Intracranial haemorrhage in DAT vs TAT and in NOAC-based DAT vs VKA-based TAT according to dabigatran doses.**

**Supplementary Figure 8. TIMI major bleeding in DAT vs TAT and in NOAC-based DAT vs VKA-based TAT according to dabigatran doses.**

**Supplementary Figure 9. TIMI major or minor bleeding in DAT vs TAT and in NOAC-based DAT vs VKA-based TAT according to dabigatran doses.**

**Supplementary Figure 10. All-cause death in DAT vs TAT and in NOAC-based DAT vs VKA-based TAT according to dabigatran doses.**

**Supplementary Figure 11. Cardiovascular death in DAT vs TAT and in NOAC-based DAT vs VKA-based TAT according to dabigatran doses.**

**Supplementary Figure 12. MACE (trial-defined) in DAT vs TAT and in NOAC-based DAT vs VKA-based TAT according to dabigatran doses.**

**Supplementary Figure 13. Stroke in DAT vs TAT and in NOAC-based DAT vs VKA-based TAT according to dabigatran doses.**

**Supplementary Figure 14. Myocardial infarction in DAT vs TAT and in NOAC-based DAT vs VKA-based TAT according to dabigatran doses.**

**Supplementary Figure 15. Stent thrombosis in DAT vs TAT and in NOAC-based DAT vs VKA-based TAT according to dabigatran doses.**

**Supplementary Figure 16. Summary of bleeding and ischemic endpoints in NOAC-DAT vs VKA-TAT.**

**Supplementary Table 1. Main characteristics of the 4 included randomized clinical trials.**

|  | **PIONEER AF-PCI** | **RE-DUAL PCI** | **AUGUSTUS** | **ENTRUST AF-PCI** |
| --- | --- | --- | --- | --- |
| Trial name | Open-Label, Randomized, Controlled, Multicenter Study Exploring Two Treatment Strategies of Rivaroxaban and a Dose-Adjusted Oral Vitamin K Antagonist Treatment Strategy in Subjects with Atrial Fibrillation who Undergo Percutaneous Coronary Intervention | Randomized Evaluation of Dual Antithrombotic Therapy With Dabigatran vs. Triple Therapy With Warfarin in Patients With Nonvalvular Atrial Fibrillation Undergoing Percutaneous Coronary Intervention | Open-Label, 2×2 Factorial, Randomized, Controlled Clinical Trial to Evaluate the Safety of Apixaban vs. Vitamin K Antagonist and Aspirin vs. Aspirin Placebo in Patients with Atrial Fibrillation and Acute Coronary Syndrome and/or Percutaneous Coronary Intervention | EdoxabaN TReatment versUS VKA in paTients with AF undergoing PCI |
| Number of patients | 2124 | 2725 | 4614 | 1506 |
| Patient population | AF patients within 72 hours after PCI with stenting | AF patients from 6 to 120 hours after successful PCI | AF patients within 14 days after having an ACS or undergoing PCI (or both) | AF patients from 4 hours to 5 days after PCI |
| Median time to randomization | Unknown | Unknown | 6 days (IQR 3 to 10) | 45.1 h (IQR 22.2 to 76.2) |
| Year of publication | 2016 | 2017 | 2019 | 2019 |
| Enrolment initiation | May 2013 | July 2014 | September 2015 | February 2017 |
| Enrolment completion | July 2015 | October 2016 | April 2018 | May 2018 |
| Treatment strategies | Rivaroxaban 15 mg daily + P2Y12 inhibitor (clopidogrel 75 mg daily) vs Rivaroxaban 2.5 mg twice daily + DAPT (aspirin 75-100 mg daily and clopidogrel 75 mg daily) vs Warfarin + DAPT | Dabigatran etexilate 110 mg twice daily + P2Y12 inhibitor (clopidogrel or Ticagrelor) vs Dabigatran etexilate 150 mg twice daily + P2Y12 inhibitor (clopidogrel or Ticagrelor) vs Warfarin (INR 2.0‐3.0) + DAPT (aspirin ≤100 mg daily and clopidogrel or Ticagrelor) | Apixaban 5 mg twice daily + DAPT (aspirin 81 mg daily and a P2Y12 inhibitor) vs Apixaban 5 mg twice daily + P2Y12 inhibitor vs Warfarin (INR 2.0‐3.0) + DAPT (aspirin 81 mg daily and a P2Y12 inhibitor) vs Warfarin (INR 2.0‐3.0) + P2Y12 inhibitor | Edoxaban 60 mg daily + P2Y12 inhibitor vs VKA + DAPT (aspirin 100 mg daily and a P2Y12 inhibitor) |
| Follow-up | 12 months | 14 months | 6 months | 12 months |
| Analysis | Modified ITT | ITT | Modified ITT and ITT | ITT |
| Major inclusion criteria | Age ≥18 years;  Patients with documented non-valvular AF within last 1 year and who had just undergone PCI with stent placement for atherosclerotic disease or more than 1 year before screening if the subject has been receiving OAC for the AF for 3 months immediately before the index PCI | Age ≥ 18 years; Patients with non-valvular AF who have been receiving an OAC or who are treatment-naïve prior to PCI; AF not secondary to a reversible disorder unless long-term anticoagulation was planned; ACS or unstable angina successfully treated by PCI and stenting or stable CAD with ≥1 lesion eligible for PCI that was successfully treated by elective PCI and stenting | Age ≥ 18 years;  Patients with either active or a history of AF or flutter with planned or existing use of an  OAC for prophylaxis of thromboembolism;  Patients who have had an ACS and/or a PCI within the prior 14 days; Planned use of an approved P2Y12 inhibitor for at least 6 months | Age ≥ 18 years;  OAC indication for AF for a period of at least 12 m following successful PCI with stenting. |
| Major exclusion criteria | History of stroke/TIA, significant gastrointestinal bleeding within 12 months before randomization, eGFR<30 ml/min, Hb<10 g/dl | Mechanical or biological heart valves, cardiogenic shock, prior stroke, surgery, gastrointestinal bleeding, major bleeding within 1 month prior to randomization, Hb<10 g/dl, eGFR<30 ml/min, active liver disease | Patients with other conditions requiring OAC  (such as prosthetic valves or moderate or severe mitral  stenosis); Severe renal insufficiency; History of intracranial haemorrhage | Bleeding risk or systemic conditions; Medication-related factors (INR>2.5, contraindications to study drugs, concomitant antithrombotics, fibrinolytic agents, etc.); concomitant conditions (critically ill or hemodynamically unstable, prior mechanical valvular prosthesis, ischaemic stroke within 2 weeks, moderate or severe mitral stenosis, planned coronary or vascular intervention or major surgery within 12 m, creatinine clearance <15 mL/min or on dialysis, known abnormal liver function, Hb<8 g/dl or Platelets <50x109/L, etc.) |
| Primary safety endpoint | A composite of major bleeding or minor bleeding according to the TIMI or bleeding  requiring medical attention | A composite of major or clinically relevant nonmajor bleeding event according to ISTH | A composite of major or clinically relevant nonmajor bleeding event according to ISTH | A composite of major or clinically relevant nonmajor bleeding event according to ISTH |
| MACE definition | A composite of cardiovascular death, MI, or stroke | A composite of all‐cause death or ischemic event (including stroke, MI, SE, or unplanned revascularization | A composite of all‐cause death or  ischemic event (including stroke, MI, ST definite/probable, urgent revascularization) | A composite of cardiovascular death or ischemic event (including stroke, MI, ST definite, SE) |
| Stent thrombosis | Definite ST (not clearly reported) | Definite ST | Definite/probable ST | Definite ST |
| Sponsor | Janssen Scientific Affairs and Bayer Pharmaceuticals | Boehringer Ingelheim | Bristol-Myers Squibb and Pfizer | Daiichi Sankyo |

**Abbreviations:** ACS=acute coronary syndrome; eGFR=estimated glomerular filtration rate; Hb=haemoglobin; IQR=interquartile range; ISTH=International Society on Thrombosis and Haemostasis; ITT=intention-to-treat; MACE=major adverse cardiovascular events; MI=myocardial infarction; OAC=oral anticoagulant; PCI=percutaneous coronary intervention; SE=systemic embolism; ST=stent thrombosis; VKA=vitamin-K antagonist.

**Supplementary Table 2. Baseline characteristics of patients enrolled in the 4 included trials.**

|  | **PIONEER AF-PCI** | | **RE-DUAL PCI** | | | **AUGUSTUS*** | | **ENTRUST AF-PCI** | |
| --- | --- | --- | --- | --- | --- | --- | --- | --- | --- |
| Treatment arm | Rivaroxaban 15mg qd+P2Y12i | VKA+DAPT | Dabigatran 110mg bid+P2Y12i | Dabigatran 150mg bid+P2Y12i | VKA+DAPT | Apixaban 5mg bid/VKA+P2Y12i | Apixaban 5mg bid/VKA+DAPT | Edoxaban 60mg +P2Y12i | VKA+DAPT |
| N. of patients | 709 | 706 | 981 | 763 | 981 | 2307 | 2307 | 751 | 755 |
| Age | 70.4 | 69.9 | 71.5 | 68.6 | 71.7 | 70.6 | 70.8 | 69 | 70 |
| Female sex | 25.5% | 26.6% | 25.8% | 22.4% | 23.5% | 27.8% | 30.2% | 25.8% | 25.4% |
| BMI | 28.6 | 29.0 | - | - | - | - | - | 28.5 | 28.9 |
| Current smoker | 5.2% | 6.8% | - | - | - | - | - | 15.6% | 14.6% |
| Creatinine clearance (ml/min) | 78.3 | 80.7 | 76.3 | 83.7 | 75.4 | 79.7 | 78.6 | 71.8 | 71.7 |
| Creatinine clearance <60 ml/min | 30% | 26.5% | - | - | - | - | - | - | - |
| Creatinine clearance <30 ml/min | 1.2% | 0.3% | 16.0% | 15.2% | 19.2% | - | - | 1.9% | 1.8% |
| Diabetes | 28.8% | 31.3% | 36.9% | 34.1% | 37.9% | 36.2% | 36.5% | 34.5% | 34.2% |
| Hypertension | 73.3% | 75.4% | - | - | - | 88.5% | 88.0% | 89.7% | 91.0% |
| Dyslipidaemia | 42.6% | 44.8% | - | - | - | - | - | 66.2% | 64.1% |
| Prior MI | 19.8% | 22.2% | 24.2% | 25.4% | 27.3% | - | - | 25.0% | 23.4% |
| Prior PCI | - | - | 33.2% | 31.3% | 35.4% | - | - | 26.5% | 25.8% |
| Prior stroke | - | - | 7.5% | 6.8% | 10.2% | 14.7%§ | 13.0%§ | 12.9% | 12.2% |
| Prior bleeding | 1.0%# | 0.7%# | - | - | - | - | - | 7.5% | 6.5% |
| Type of index event |  |  |  |  |  |  |  |  |  |
| ACS | 39.6% | 36.4% | 51.9% | 51.2% | 48.4% | 61.7% | 60.7% | 51.7% | 51.5% |
| Stable CAD | 60.4% | 63.6% | 48.1% | 48.8% | 51.6% | 38.3% | 39.3% | 48.3% | 48.5% |
| Type of AF |  |  |  |  |  |  |  |  |  |
| Paroxismal | 42.4% | 44.4% | 49.6% | 49.8% | 49.4% | - | - | 53.5% | 47.5% |
| Persistent | 20.6% | 21.1% | 17.7% | 17.3% | 18.2% | - | - | 18.6% | 19.4% |
| Permanent | 37.0% | 34.5% | 32.6% | 32.8% | 32.4% | - | - | 27.8% | 33.2% |
| Type of P2Y12i |  |  |  |  |  |  |  |  |  |
| Clopidogrel | 93.1% | 96.3% | 86.4% | 86.9% | 90.3% | 93.2% | 92.1% | 92.8% | 92.1% |
| Prasugrel | 1.7% | 0.7% | 0% | 0% | 0% | 0.9% | 1.4% | 0.7% | 0.4% |
| Ticagrelor | 5.2% | 3.0% | 12.6% | 12.1% | 7.8% | 5.9% | 6.5% | 6.5% | 7.5% |
| CHA2DS2-VASc | - | - | 3.7 | 3.3 | 3.8 | 3.9 | 3.9 | 4.0 | 4.0 |
| ≤2 | 26.7% | 20.8% | 23.4% | 32.4% | 19.7% | 20.3% | 20.8% | 23.2% | 18.7% |
| ≥3 | 73.3% | 79.2% | 76.6% | 67.6% | 80.3% | 79.7% | 79.2% | 76.8% | 81.3% |
| HAS-BLED | - | - | 2.7 | 2.6 | 2.8 | 2.9 | 2.8 | 3.0 | 3.0 |
| ≤2 | 27.7% | 29.5% | 33.2% | 40.5% | 29.4% | 48.4% | 48.3% | 33.9% | 28.9% |
| ≥3 | 72.3% | 70.5% | 66.8% | 59.5% | 70.6% | 51.6% | 51.7% | 66.1% | 71.1% |
| PCI performed | 100% | 100% | 100% | 100% | 100% | 76.1% | 76.1% | 100% | 100% |
| Type of stent |  |  |  |  |  |  |  |  |  |
| BMS | 32.6% | 31.8% | 15.1% | 16.1% | 13.6% | - | - | 11.1% | 13.4% |
| DES | 65.4% | 66.5% | 82.1% | 81.5% | 84.6% | - | - | 86.2% | 83.2% |
| BMS+DES | 2.0% | 1.7% | 1.9% | 1.3% | 1.2% | - | - | 1.6% | 1.3% |
| other | 0 | 0 | 0.8% | 1.0% | 0.5% | - | - | 1.1% | 2.0% |

Numbers are means or medians for continuous variables and percentages for categorical variables.

*AUGUSTUS trial has a 2x2 factorial design including 4 groups of randomized treatments, but for the purpose of the main analysis of this study comparing DAT vs TAT we included the characteristics of these 2 groups.

#This is prior gastrointestinal bleeding.

§This is prior stroke, TIA or thromboembolism.

Abbreviations: ACS=acute coronary syndrome; AF=atrial fibrillation; BMI=body mass index; BMS=bare-metal stent; CAD=coronary artery disease; DAPT=dual antiplatelet therapy (P2Y12i+aspirin); DES=drug-eluting stent; MI=myocardial infarction; PCI=percutaneous coronary intervention; VKA=vitamin K antagonist;

**Supplementary Table 3. Risk of bias of individual studies by Cochrane risk assessment tool.**

|  | **PIONEER AF-PCI** | **RE-DUAL PCI** | **AUGUSTUS** | **ENTRUST AF-PCI** |
| --- | --- | --- | --- | --- |
| Random sequence generation  *(Selection bias)* | 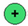 | 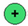 | 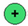 | 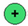 |
| Allocation concealment *(Selection bias*) | 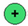 | 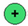 | 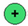 | 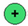 |
| Blinding of participants and personnel *(Performance bias)* * | 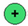 | 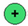 | 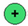 | 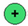 |
| Incomplete outcome data *(Attrition bias)* | 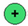 | 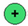 | 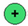 | 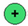 |
| Selective reporting *(Reporting bias)* | 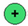 | 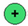 | 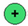 | 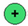 |
| Other sources of bias | 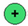 | 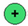 | 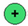 | 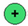 |

* All four trials were open label, but the outcome assessment was blinded, thus the study design has not influenced reported outcomes and the quality of evidence.

**Supplementary Table 4. Leave-one-out sensitivity analysis of the primary bleeding endpoint.**

|  | **DAT VS TAT** | | | **NOAC-DAT VS VKA-TAT** | | |
| --- | --- | --- | --- | --- | --- | --- |
|  | RR, 95% CI | P value | I2 | RR, 95% CI | P value | I2 |
| AUGUSTUS | 0.71 (0.60-0.83) | <0.0001 | 55% | 0.71 (0.60-0.83) | <0.0001 | 55% |
| ENTRUST AF-PCI | 0.62 (0.55-0.69) | <0.0001 | 21% | 0.56 (0.41-0.75) | 0.0001 | 86% |
| PIONEER | 0.67 (0.54-0.83) | 0.0002 | 79% | 0.60 (0.41-0.88) | 0.01 | 91% |
| RE-DUAL PCI | 0.67 (0.53-0.86) | 0.001 | 79% | 0.60 (0.39-0.93) | 0.02 | 91% |

**Supplementary Table 5. Risk Ratios estimated through a fixed-effect model.**

|  | **DAT vs TAT** | | | **NOAC-DAT vs VKA-TAT** | | |
| --- | --- | --- | --- | --- | --- | --- |
|  | **RR (95% CI)** | **P value** | **I2 (%)** | **RR (95% CI)** | **P value** | **I2 (%)** |
| ISTH major or CRNMB | 0.65 (0.59-0.71) | <0.00001 | 69 | 0.62 (0.57-0.69) | <0.00001 | 87 |
| ISTH major bleeding | 0.64 (0.54-0.75) | <0.00001 | 37 | 0.59 (0.49-0.71) | <0.00001 | 68 |
| CRNMB | 0.66 (0.59-0.73) | <0.00001 | 66 | 0.64 (0.57-0.72) | <0.00001 | 84 |
| Intracranial hemorrhage | 0.54 (0.32-0.92) | 0.02 | 46 | 0.33 (0.17-0.74) | 0.001 | 0 |
| Primary bleeding endpoint trial-defined | 0.65 (0.59-0.71) | <0.00001 | 69 | 0.62 (0.57-0.69) | <0.00001 | 87 |
| TIMI major bleeding | 0.54 (0.42-0.71) | <0.00001 | 0 | 0.53 (0.39-0.71) | <0.00001 | 0 |
| TIMI major or minor bleeding | 0.65 (0.56-0.75) | <0.00001 | 76 | 0.63 (0.54-0.74) | <0.00001 | 82 |
| All-cause death | 1.10 (0.91-1.34) | 0.32 | 0 | 1.12 (0.90-1.39) | 0.32 | 0 |
| Cardiovascular death | 1.10 (0.86-1.41) | 0.44 | 0 | 1.12 (0.85-1.47) | 0.42 | 0 |
| MACE trial-defined | 1.08 (0.95-1.23) | 0.25 | 0 | 1.06 (0.92-1.23) | 0.44 | 0 |
| Stroke | 1.00 (0.69-1.45) | 0.99 | 0 | 0.88 (0.58-1.33) | 0.54 | 0 |
| Myocardial infarction | 1.22 (0.99-1.52) | 0.06 | 0 | 1.19 (0.93-1.52) | 0.17 | 0 |
| Stent thrombosis | 1.60 (1.02-2.50) | 0.04 | 0 | 1.55 (0.99-2.42) | 0.05 | 0 |

**Supplementary Table 6. Number needed to treat for benefit or harm in DAT vs TAT.**

|  | **Events**  **DAT** | **Total**  **DAT** | **Risk**  **DAT (%)*** | **Events**  **TAT** | **Total**  **TAT** | **Risk**  **TAT (%)*** | **Pooled**  **Absolute Risk Difference (%)*** | **Pooled**  **Risk Ratio** | **NNTB/NNTH** |
| --- | --- | --- | --- | --- | --- | --- | --- | --- | --- |
| ISTH major or CRNMB | 754 | 5470 | 13.42 | 961 | 4710 | 20.76 | -7.18 | 0.66 | 14 |
| ISTH major bleeding | 229 | 5470 | 4.08 | 294 | 4710 | 6.40 | -2.28 | 0.64 | 43 |
| CRNMB | 548 | 5470 | 9.81 | 693 | 4710 | 14.88 | -5.12 | 0.68 | 21 |
| Intracranial hemorrhage | 21 | 5470 | 0.40 | 34 | 4710 | 0.74 | -0.40 | 0.51 | 276 |
| Primary bleeding endpoint trial-defined | 746 | 5470 | 13.26 | 950 | 4710 | 20.54 | -7.11 | 0.66 | 14 |
| TIMI major bleeding | 88 | 5470 | 1.60 | 136 | 4710 | 2.94 | -1.28 | 0.54 | 74 |
| TIMI major or minor bleeding | 281 | 5470 | 5.33 | 392 | 4710 | 8.25 | -2.88 | 0.62 | 32 |
| All-cause death | 226 | 5496 | 4.04 | 170 | 4738 | 3.66 | 0.36 | 1.10 | 273 |
| Cardiovascular death | 148 | 5496 | 2.63 | 111 | 4738 | 2.39 | 0.26 | 1.10 | 418 |
| MACE trial-defined | 497 | 5496 | 8.59 | 362 | 4738 | 7.95 | 0.67 | 1.08 | 157 |
| Stroke | 63 | 5496 | 1.11 | 52 | 4738 | 1.11 | 0.00 | 1.00 | - |
| Myocardial infarction | 202 | 5496 | 3.64 | 141 | 4738 | 2.98 | 0.65 | 1.22 | 153 |
| Stent thrombosis | 56 | 5496 | 1.00 | 29 | 4738 | 0.62 | 0.37 | 1.59 | 273 |

*Risk DAT, Risk TAT and Risk Difference are pooled weighted estimates.

**Supplementary Table 7. NNTB and NNTH with their differences according to various risks of ISTH major bleeding and myocardial infarction.** The table includes the NNTB and NNTH calculated at each risk for major bleeding or MI. For each pair of risks (bleeding vs MI) the difference between NNTB and NNTH was calculated to have a net benefit/harm. Benefit is expressed in red (higher benefit on major bleeding than the risk of MI associated with DAT) and harm in blues. Dark red and dark blue indicate greater benefit/harm (cutoffs arbitrarily selected of -100 and 100). Light red and light blue indicate lower benefit/harm (range arbitrarily selected within -100 to 100). Orange indicates neutral effect (NNTB-NNTH=0 or within the range arbitrarily selected of -10 to 10). The Figure 7 has been generated based on these calculations.

|  | **MI risk** | **1,0** | **1,5** | **2,0** | **2,5** | **3,0** | **3,5** | **4,0** | **4,5** | **5,0** | **5,5** | **6,0** | **6,5** | **7,0** | **7,5** | **8,0** | **8,5** | **9,0** | **9,5** | **10,0** |
| --- | --- | --- | --- | --- | --- | --- | --- | --- | --- | --- | --- | --- | --- | --- | --- | --- | --- | --- | --- | --- |
| **Major bleeding risk** | **NNTB/NNTH** | **455** | **303** | **227** | **182** | **152** | **130** | **114** | **101** | **91** | **83** | **76** | **70** | **65** | **61** | **57** | **53** | **51** | **48** | **45** |
| **1,0** | **278** | **-177** | -25 | 51 | 96 | **126** | **148** | **164** | **177** | **187** | **195** | **202** | **208** | **213** | **217** | **221** | **225** | **227** | **230** | **233** |
| **1,5** | **185** | **-270** | **-118** | -42 | **3** | 33 | 55 | 71 | 84 | 94 | **102** | **109** | **115** | **120** | **124** | **128** | **132** | **134** | **137** | **140** |
| **2,0** | **139** | **-316** | **-164** | -88 | -43 | -13 | **9** | 25 | 38 | 48 | 56 | 63 | 69 | 74 | 78 | 82 | 86 | 88 | 91 | 94 |
| **2,5** | **111** | **-344** | **-192** | **-116** | -71 | -41 | -19 | **-3** | **10** | 20 | 28 | 35 | 41 | 46 | 50 | 54 | 58 | 60 | 63 | 66 |
| **3,0** | **93** | **-362** | **-210** | **-134** | -89 | -59 | -37 | -21 | **-8** | **2** | **10** | 17 | 23 | 28 | 32 | 36 | 40 | 42 | 45 | 48 |
| **3,5** | **79** | **-376** | **-224** | **-148** | **-103** | -73 | -51 | -35 | -22 | -12 | **-4** | **3** | **9** | 14 | 18 | 22 | 26 | 28 | 31 | 34 |
| **4,0** | **69** | **-386** | **-234** | **-158** | **-113** | -83 | -61 | -45 | -32 | -22 | -14 | **-7** | **-1** | **4** | **8** | 12 | 16 | 18 | 21 | 24 |
| **4,5** | **62** | **-393** | **-241** | **-165** | **-120** | -90 | -68 | -52 | -39 | -29 | -21 | -14 | **-8** | **-3** | **1** | **5** | **9** | 11 | 14 | 17 |
| **5,0** | **56** | **-399** | **-247** | **-171** | **-126** | -96 | -74 | -58 | -45 | -35 | -27 | -20 | -14 | **-9** | **-5** | **-1** | **3** | **5** | **8** | 11 |
| **5,5** | **51** | **-404** | **-252** | **-176** | **-131** | **-101** | -79 | -63 | -50 | -40 | -32 | -25 | -19 | -14 | **-10** | **-6** | **-2** | **0** | **3** | **6** |
| **6,0** | **46** | **-409** | **-257** | **-181** | **-136** | **-106** | -84 | -68 | -55 | -45 | -37 | -30 | -24 | -19 | -15 | -11 | **-7** | **-5** | **-2** | **1** |
| **6,5** | **43** | **-412** | **-260** | **-184** | **-139** | **-109** | -87 | -71 | -58 | -48 | -40 | -33 | -27 | -22 | -18 | -14 | **-10** | **-8** | **-5** | **-2** |
| **7,0** | **40** | **-415** | **-263** | **-187** | **-142** | **-112** | -90 | -74 | -61 | -51 | -43 | -36 | -30 | -25 | -21 | -17 | -13 | -11 | **-8** | **-5** |
| **7,5** | **37** | **-418** | **-266** | **-190** | **-145** | **-115** | -93 | -77 | -64 | -54 | -46 | -39 | -33 | -28 | -24 | -20 | -16 | -14 | -11 | **-8** |
| **8,0** | **35** | **-420** | **-268** | **-192** | **-147** | **-117** | -95 | -79 | -66 | -56 | -48 | -41 | -35 | -30 | -26 | -22 | -18 | -16 | -13 | **-10** |
| **8,5** | **33** | **-422** | **-270** | **-194** | **-149** | **-119** | -97 | -81 | -68 | -58 | -50 | -43 | -37 | -32 | -28 | -24 | -20 | -18 | -15 | -12 |
| **9,0** | **31** | **-424** | **-272** | **-196** | **-151** | **-121** | -99 | -83 | -70 | -60 | -52 | -45 | -39 | -34 | -30 | -26 | -22 | -20 | -17 | -14 |
| **9,5** | **29** | **-426** | **-274** | **-198** | **-153** | **-123** | **-101** | -85 | -72 | -62 | -54 | -47 | -41 | -36 | -32 | -28 | -24 | -22 | -19 | -16 |
| **10,0** | **28** | **-427** | **-275** | **-199** | **-154** | **-124** | **-102** | -86 | -73 | -63 | -55 | -48 | -42 | -37 | -33 | -29 | -25 | -23 | -20 | -17 |

**Supplementary Figure 1. Flow-chart.**


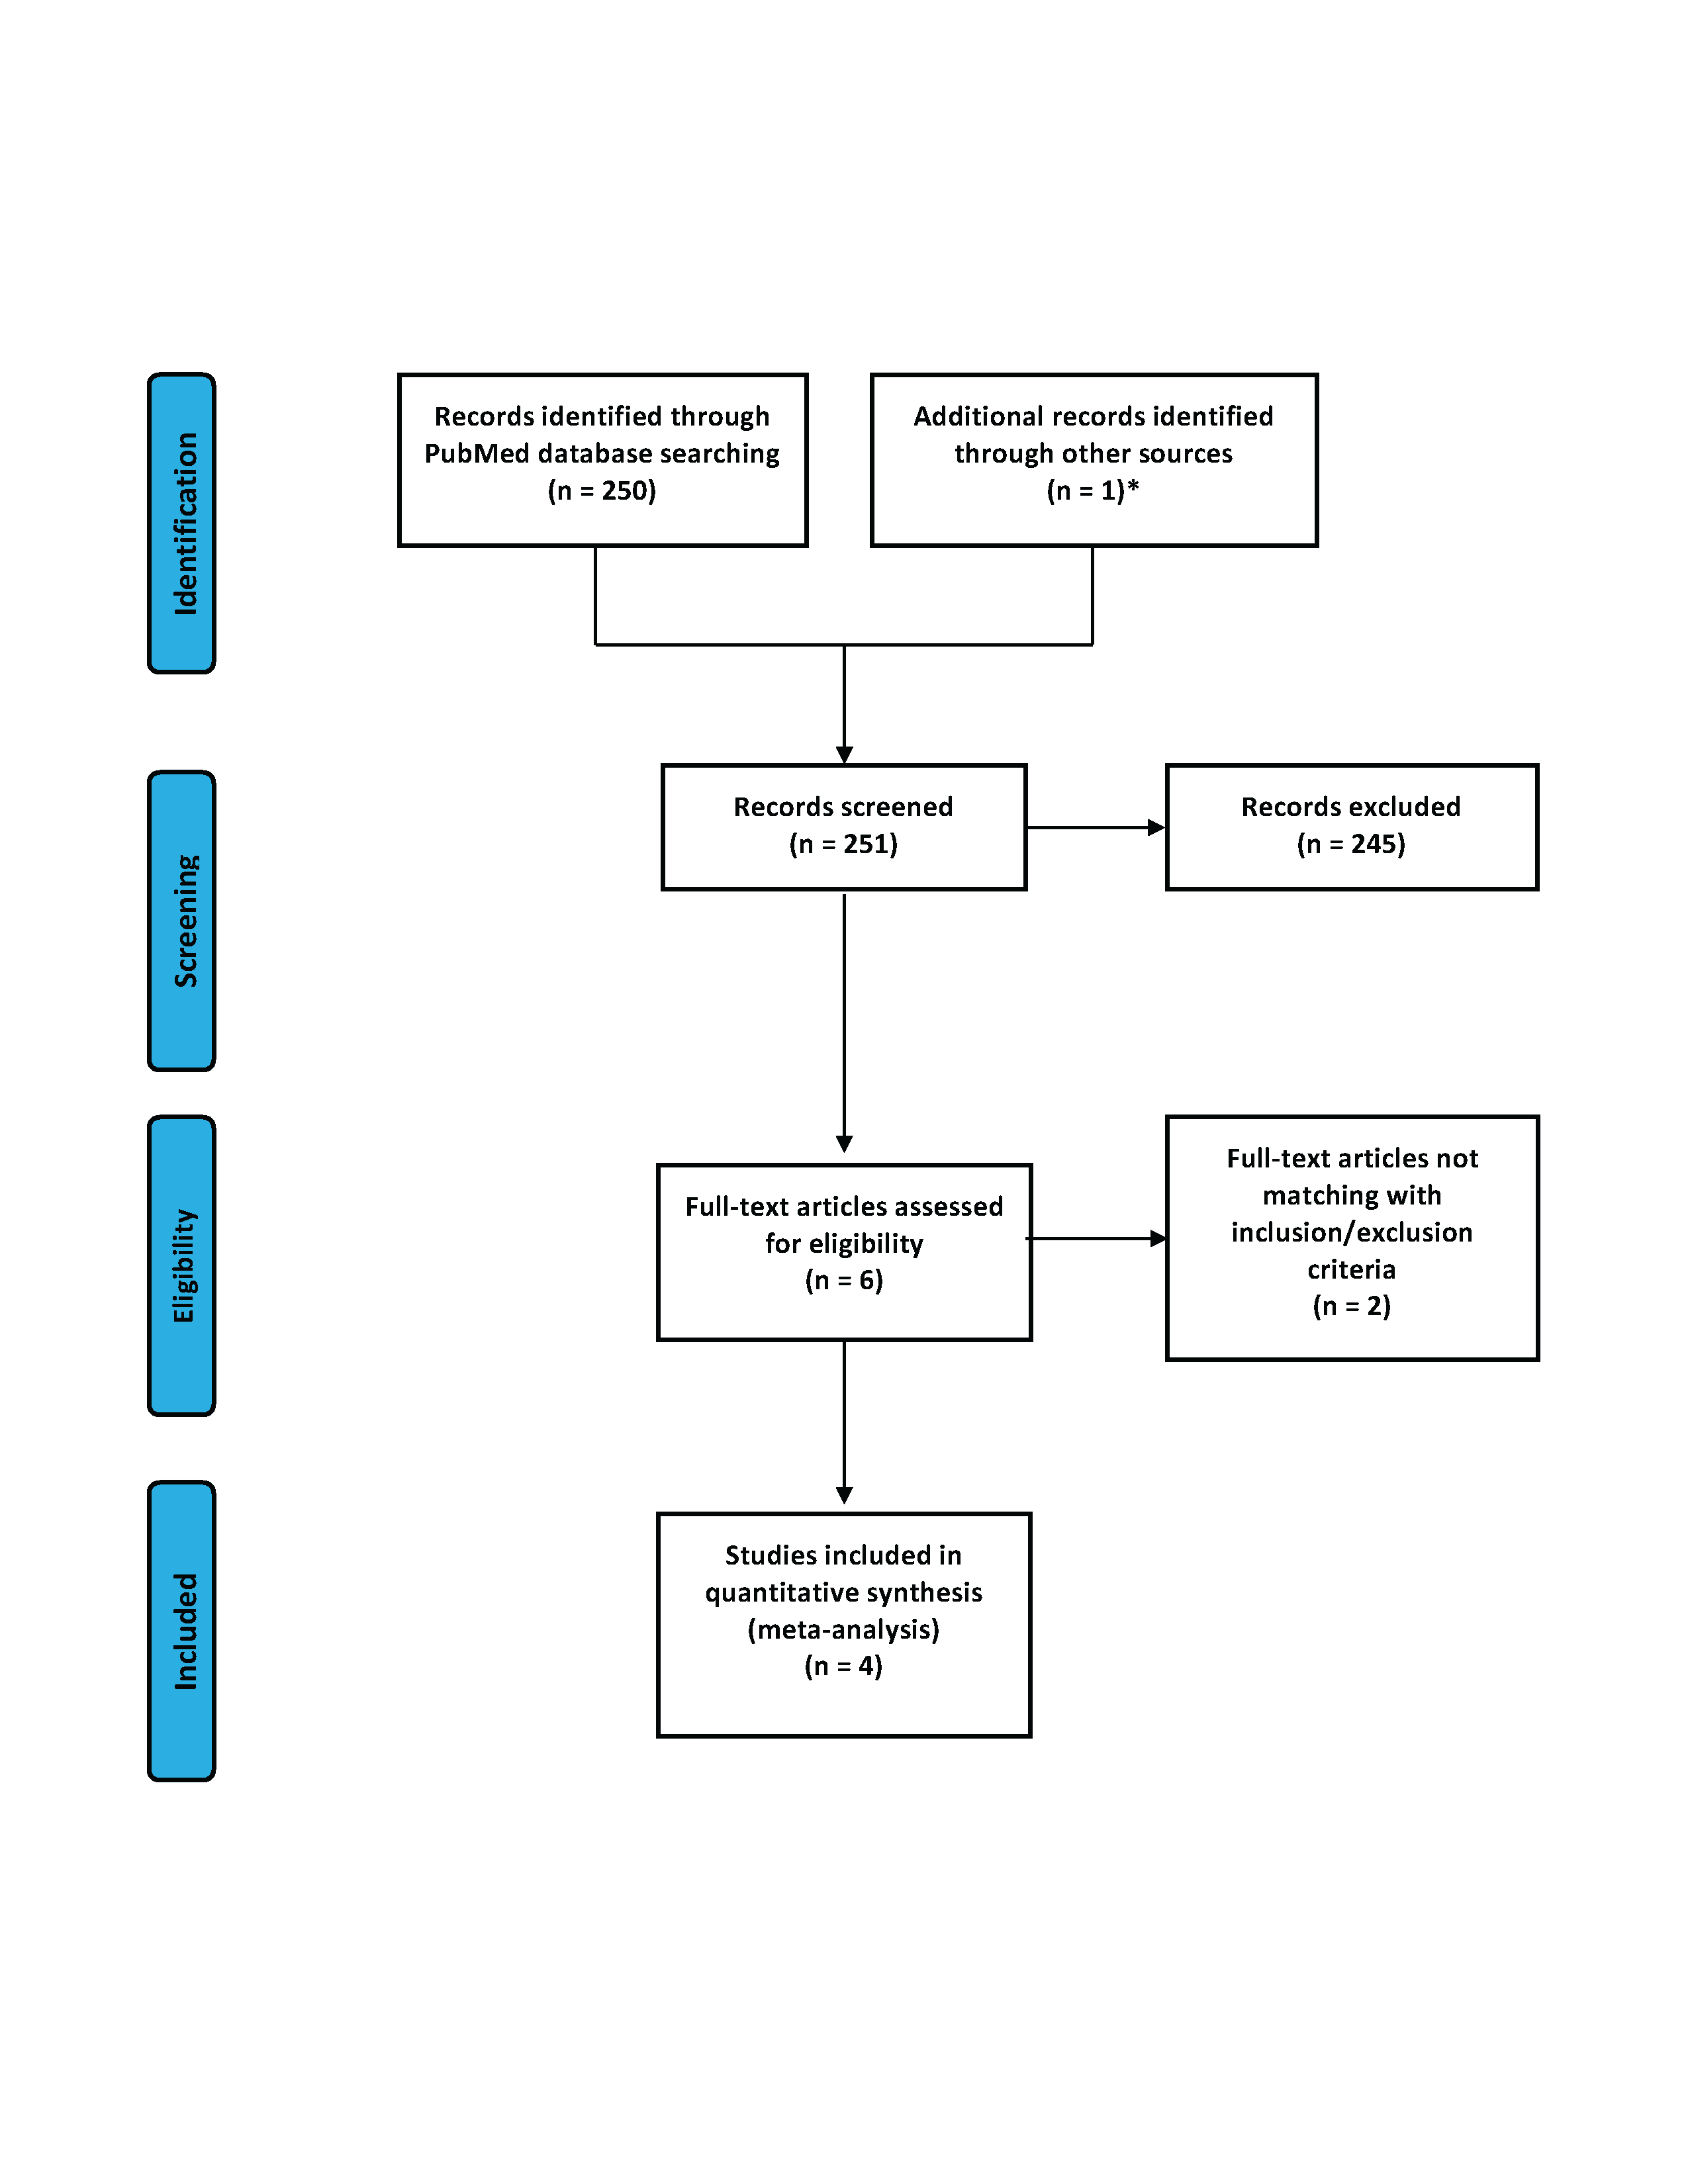


*ENTRUST AF-PCI data and paper were internally available.

**Supplementary Figure 2. Secondary bleeding endpoints in DAT vs TAT.**

**
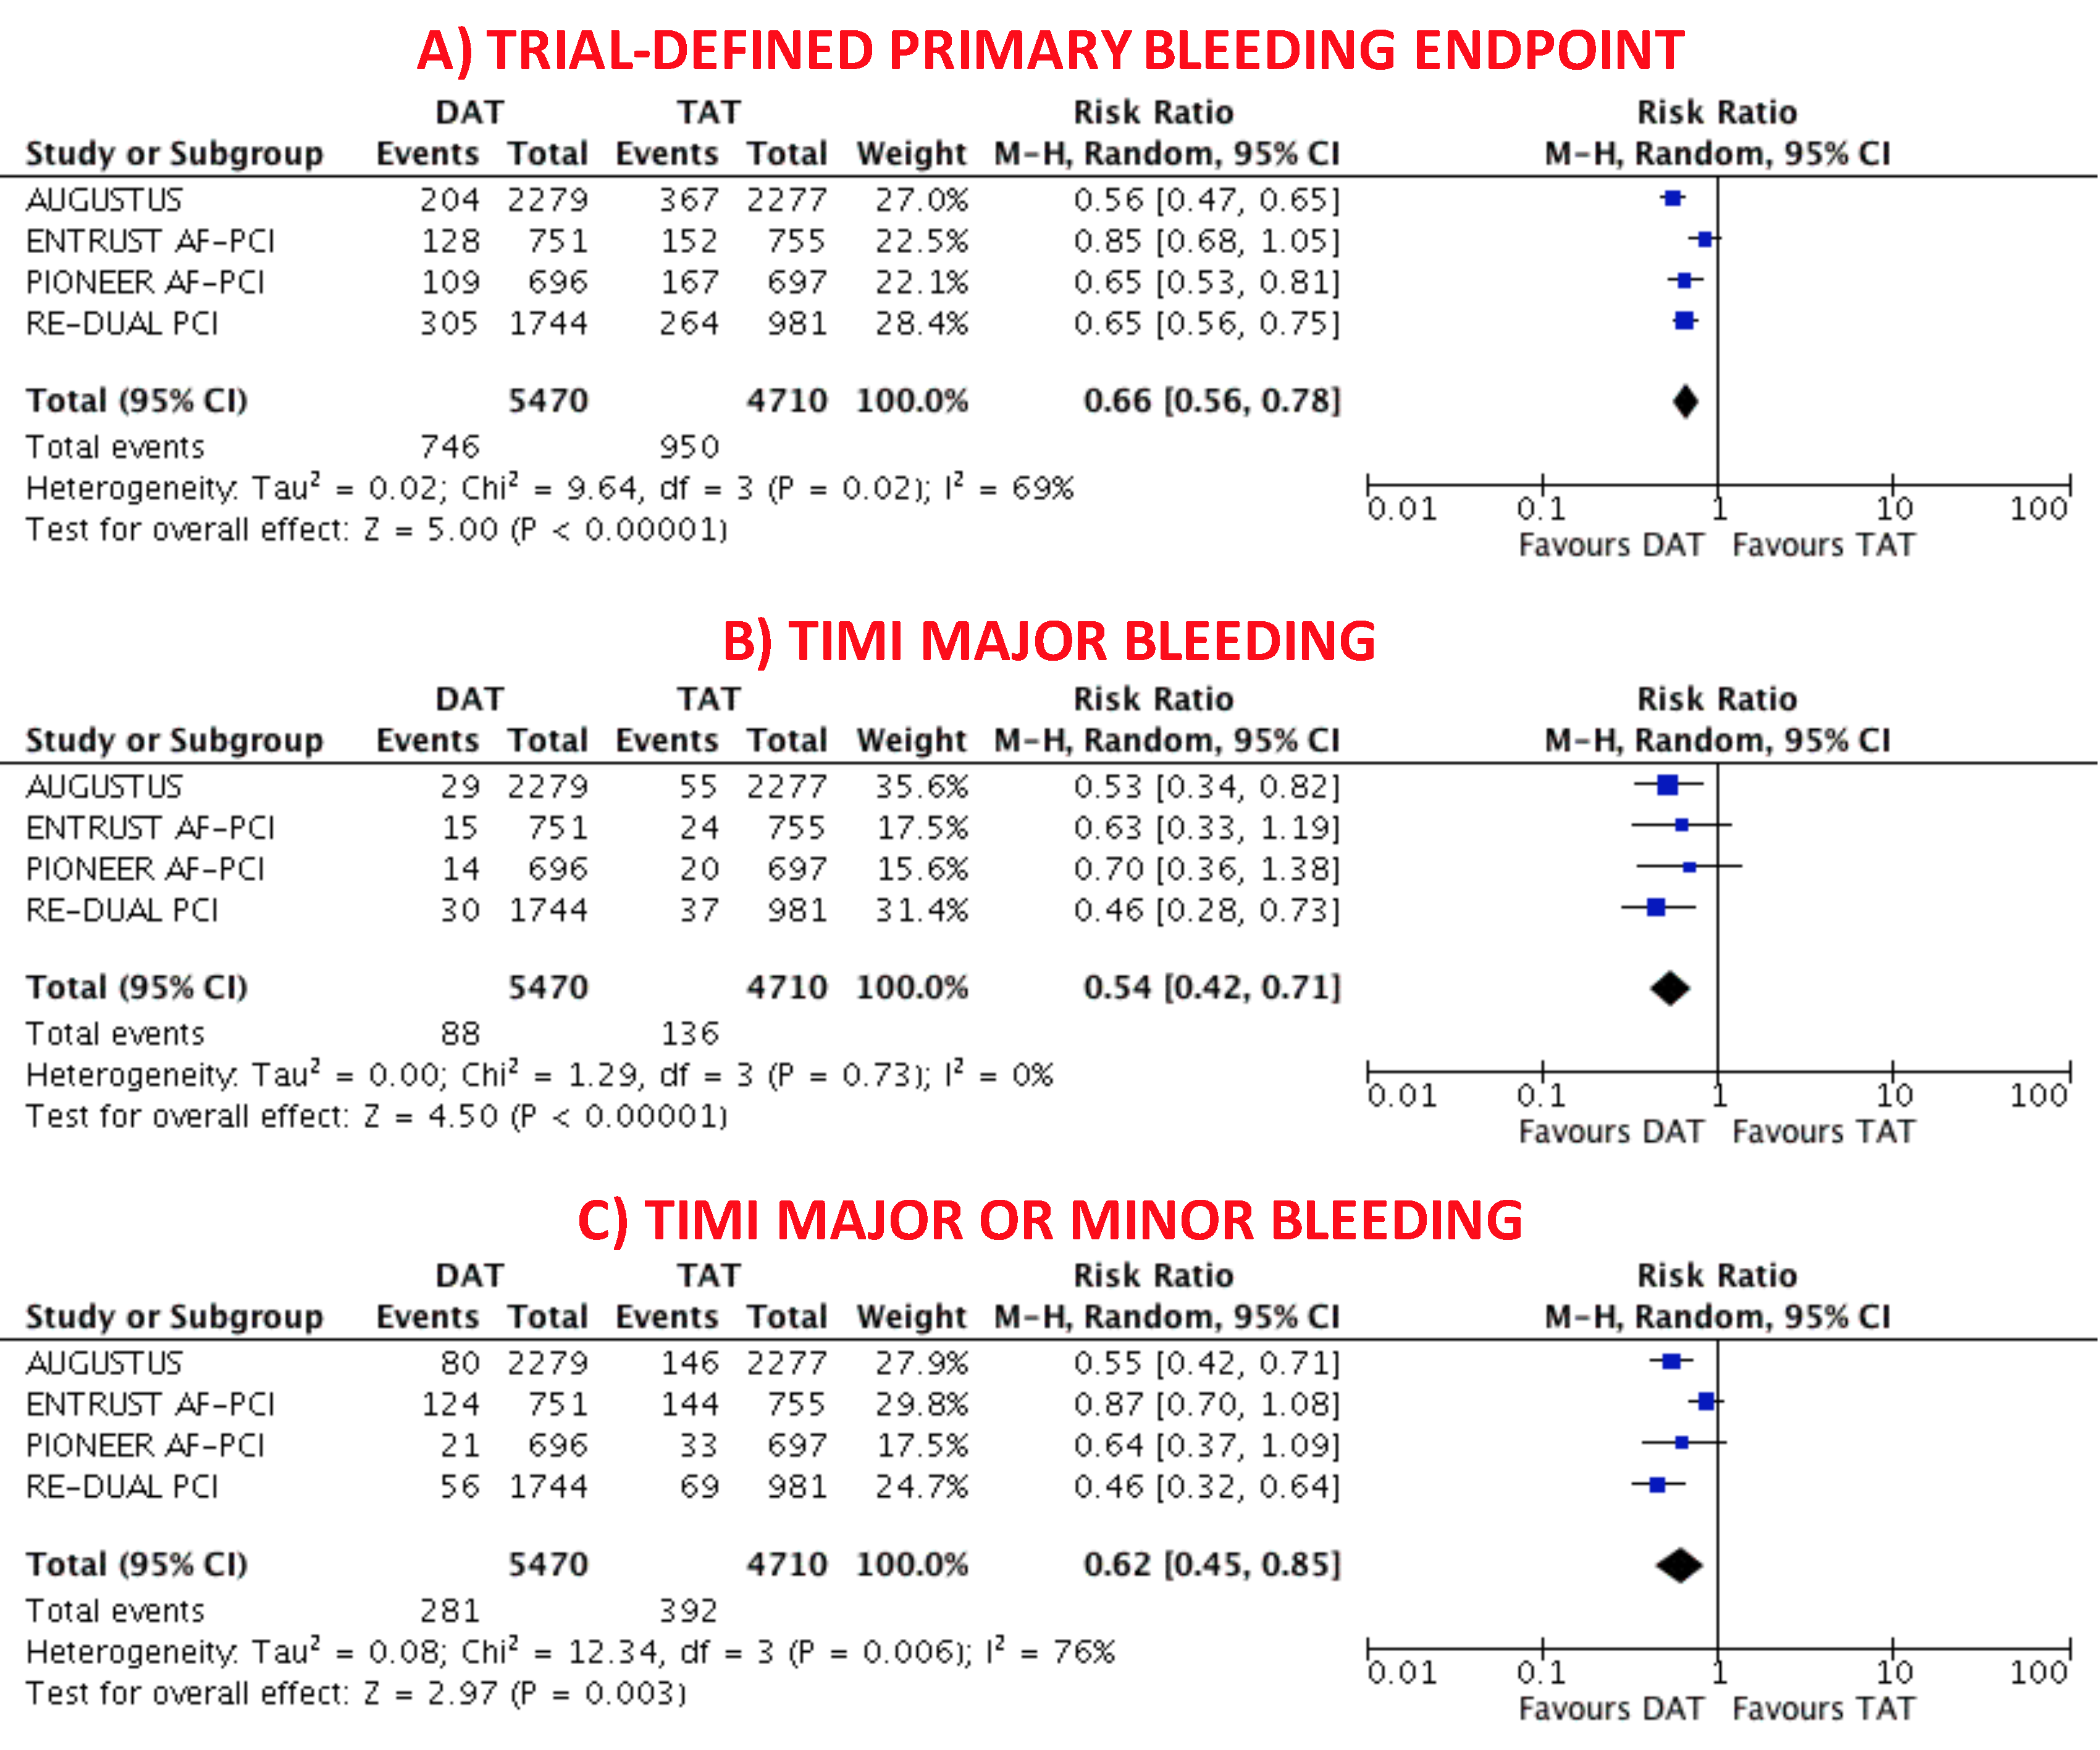
**

**Supplementary Figure 3. Secondary bleeding endpoints in NOAC-based DAT vs VKA-based TAT.**

**
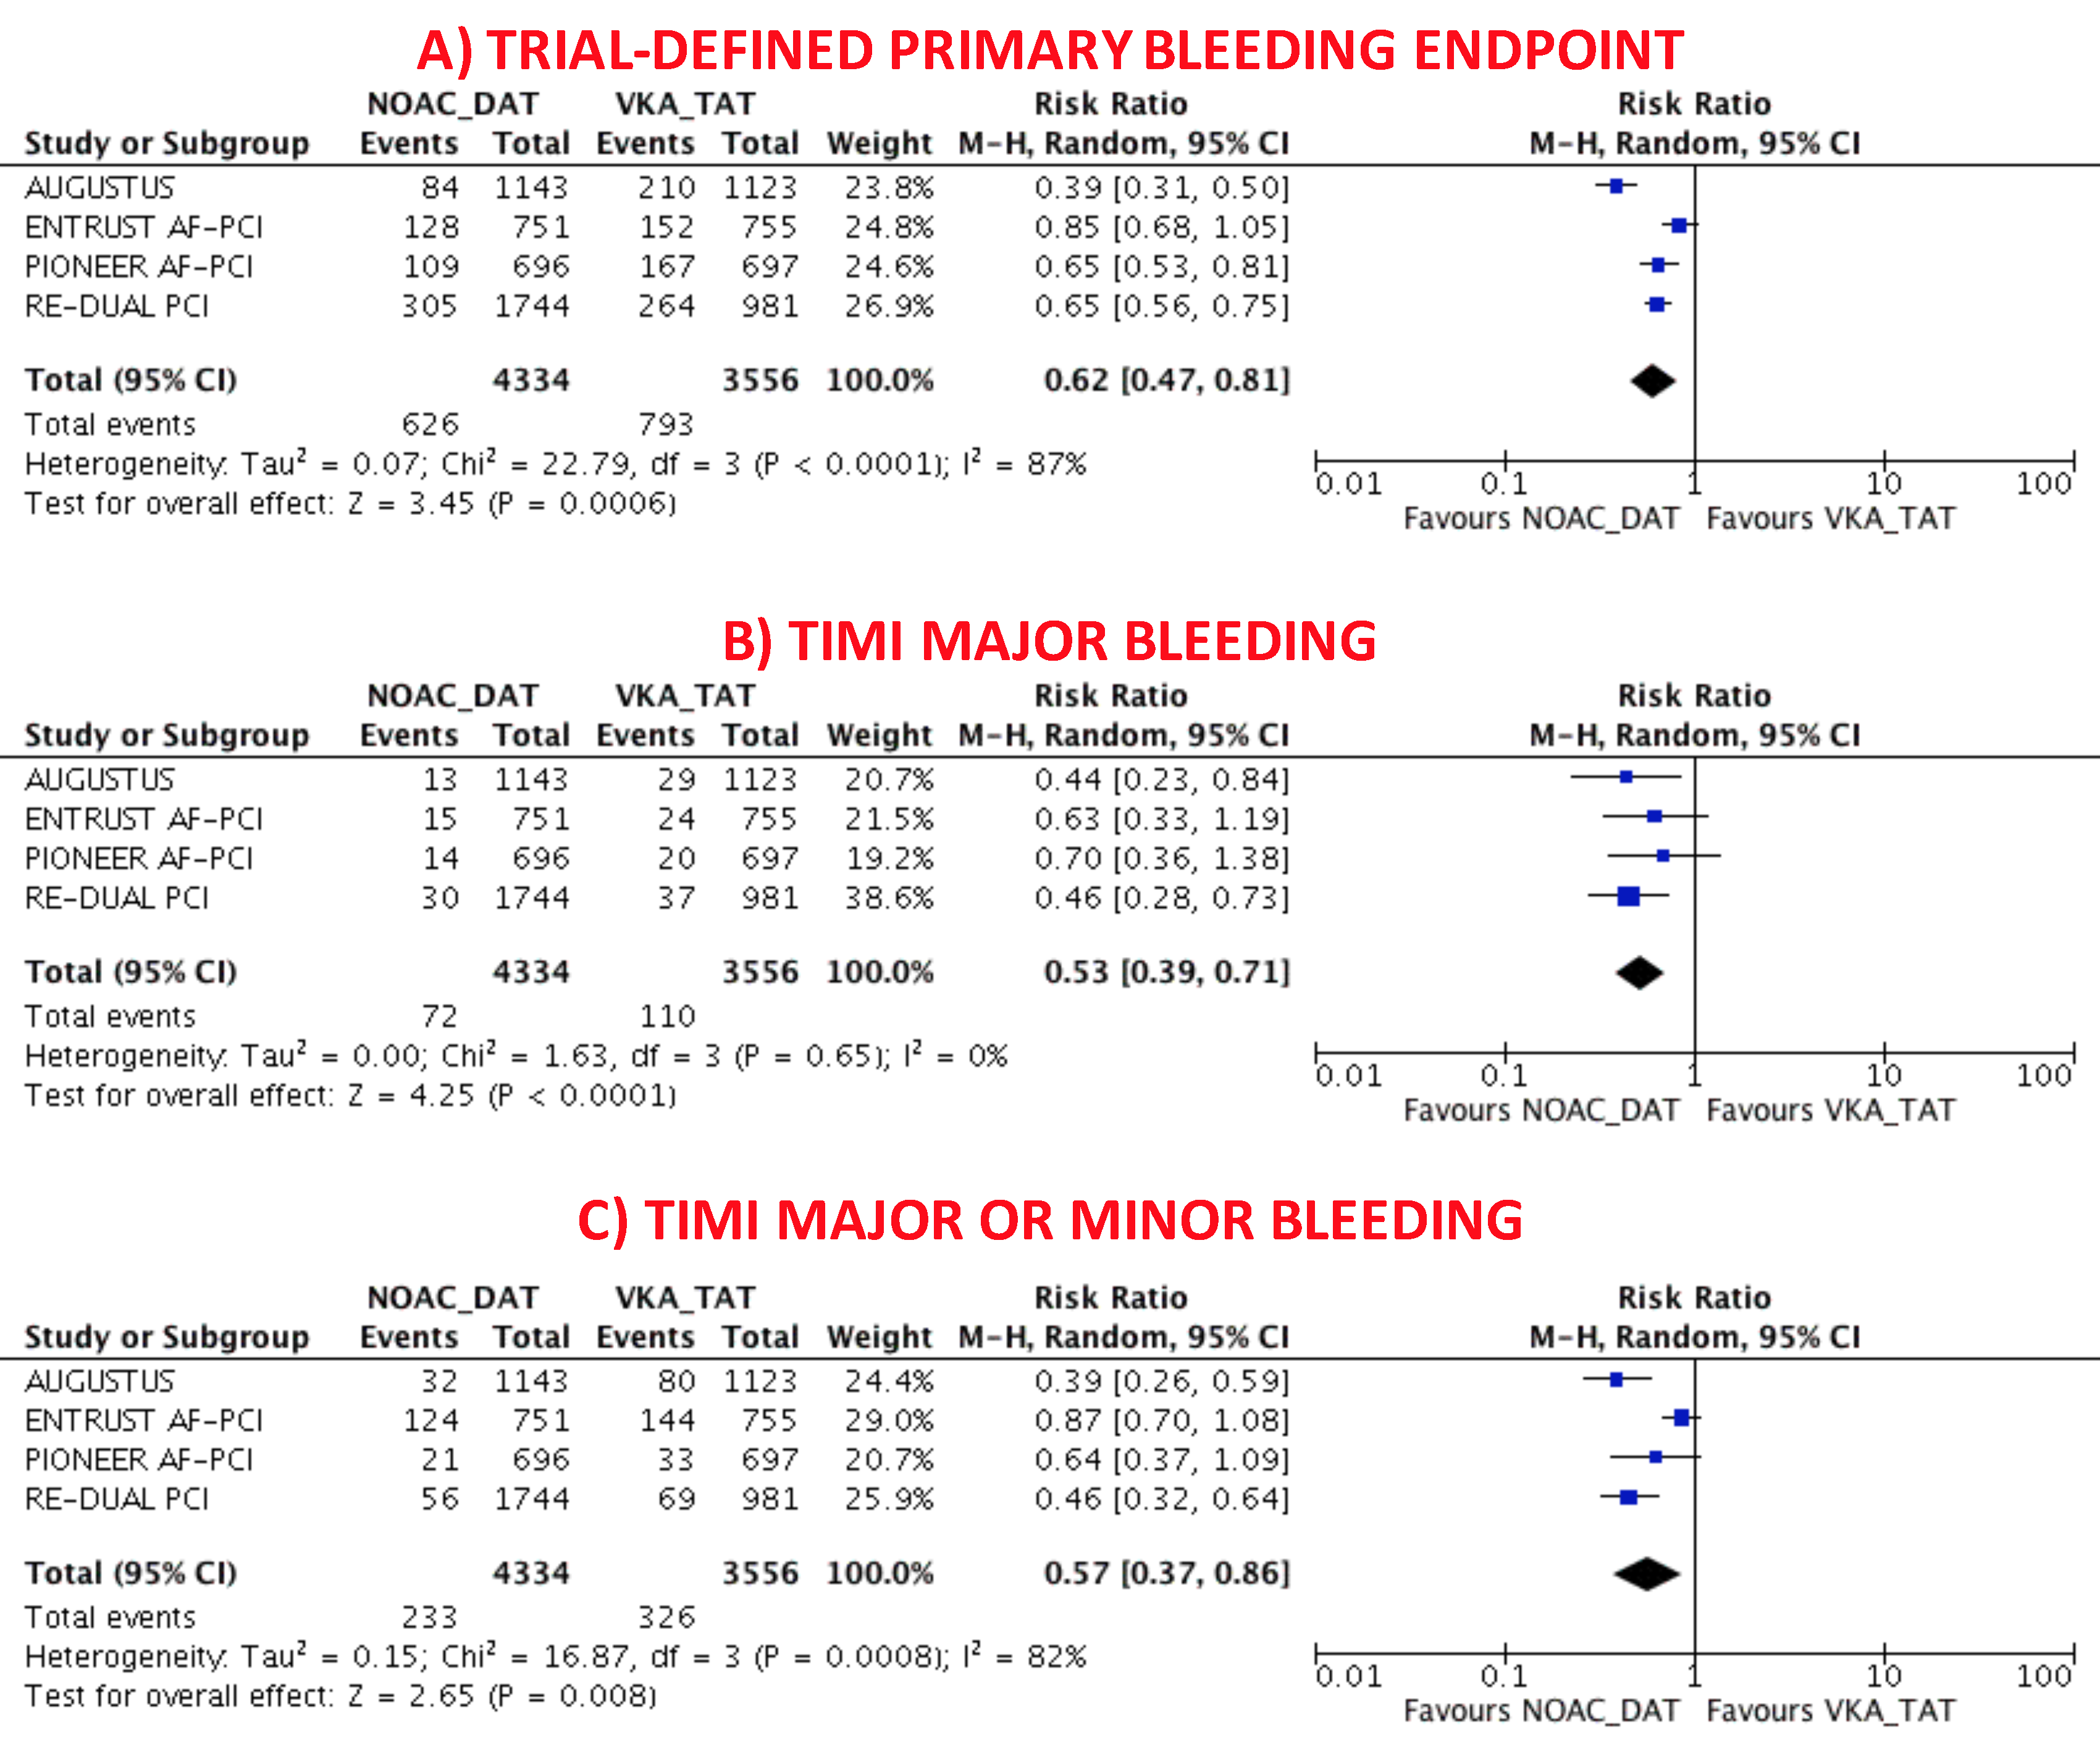
**

**Supplementary Figure 4. ISTH major or clinically relevant nonmajor bleeding in DAT vs TAT and in NOAC-based DAT vs VKA-based TAT according to dabigatran doses.**

**
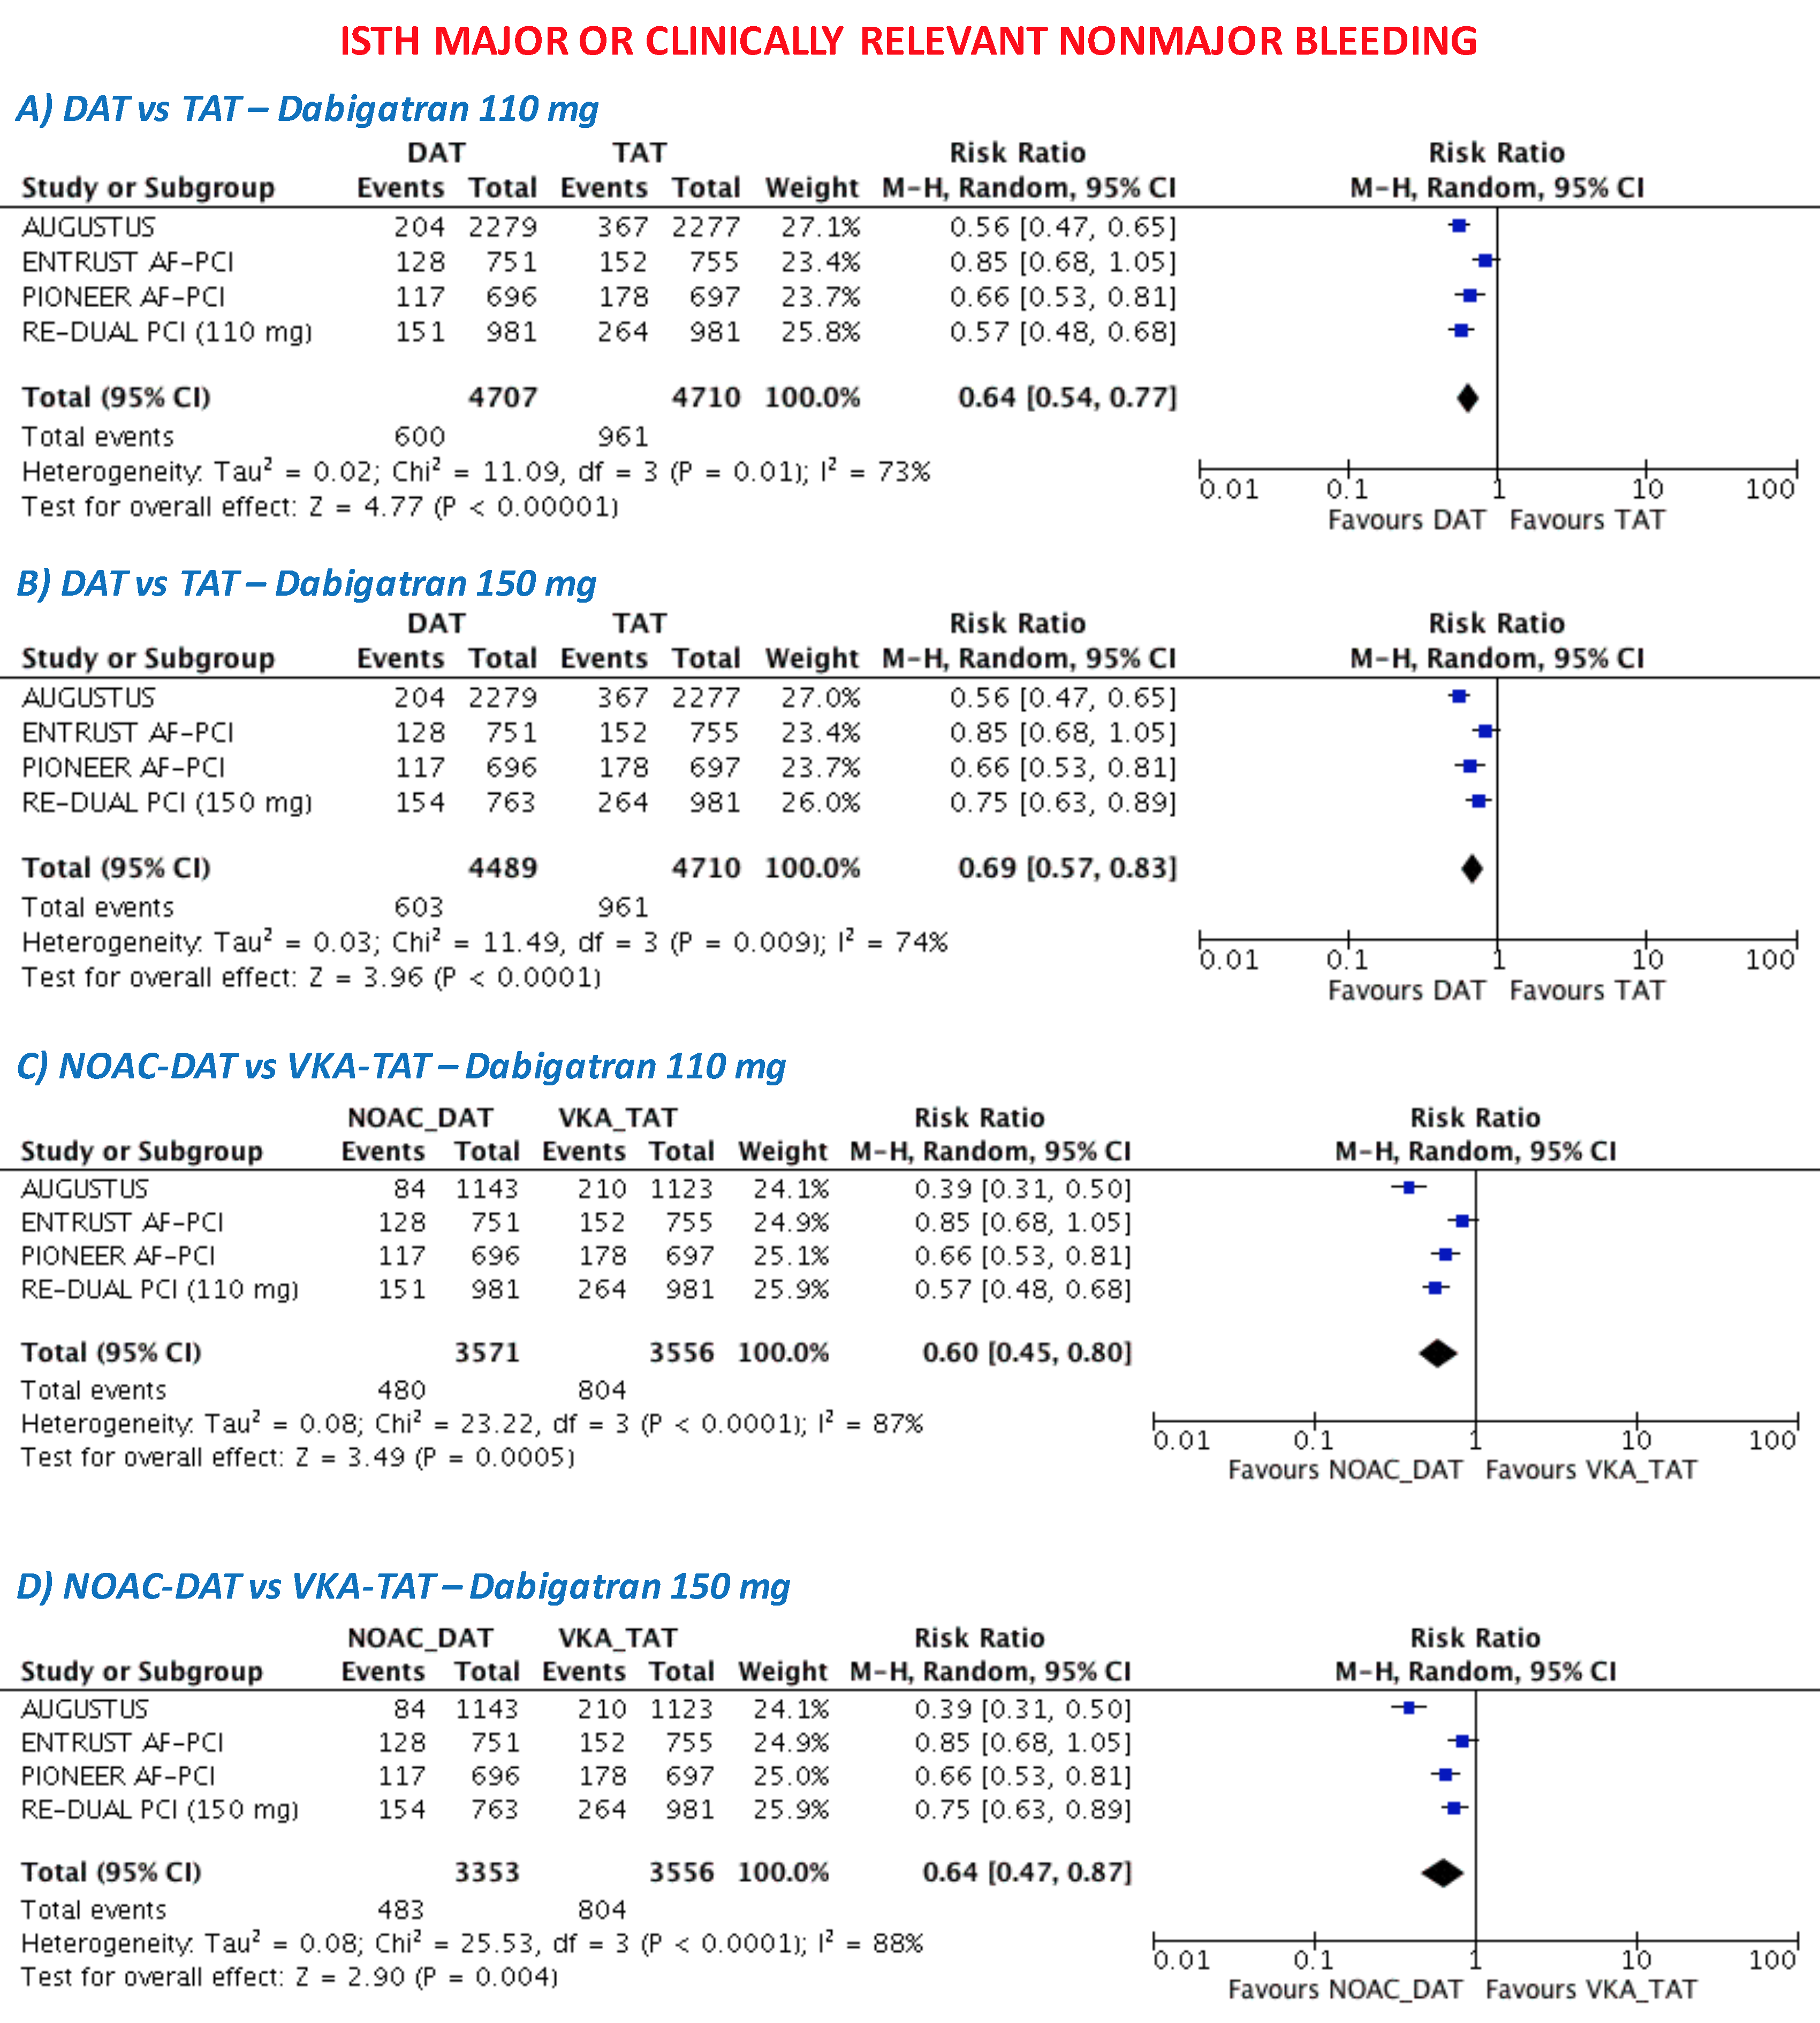
**

**Supplementary Figure 5. ISTH major bleeding in DAT vs TAT and in NOAC-based DAT vs VKA-based TAT according to dabigatran doses.**

**
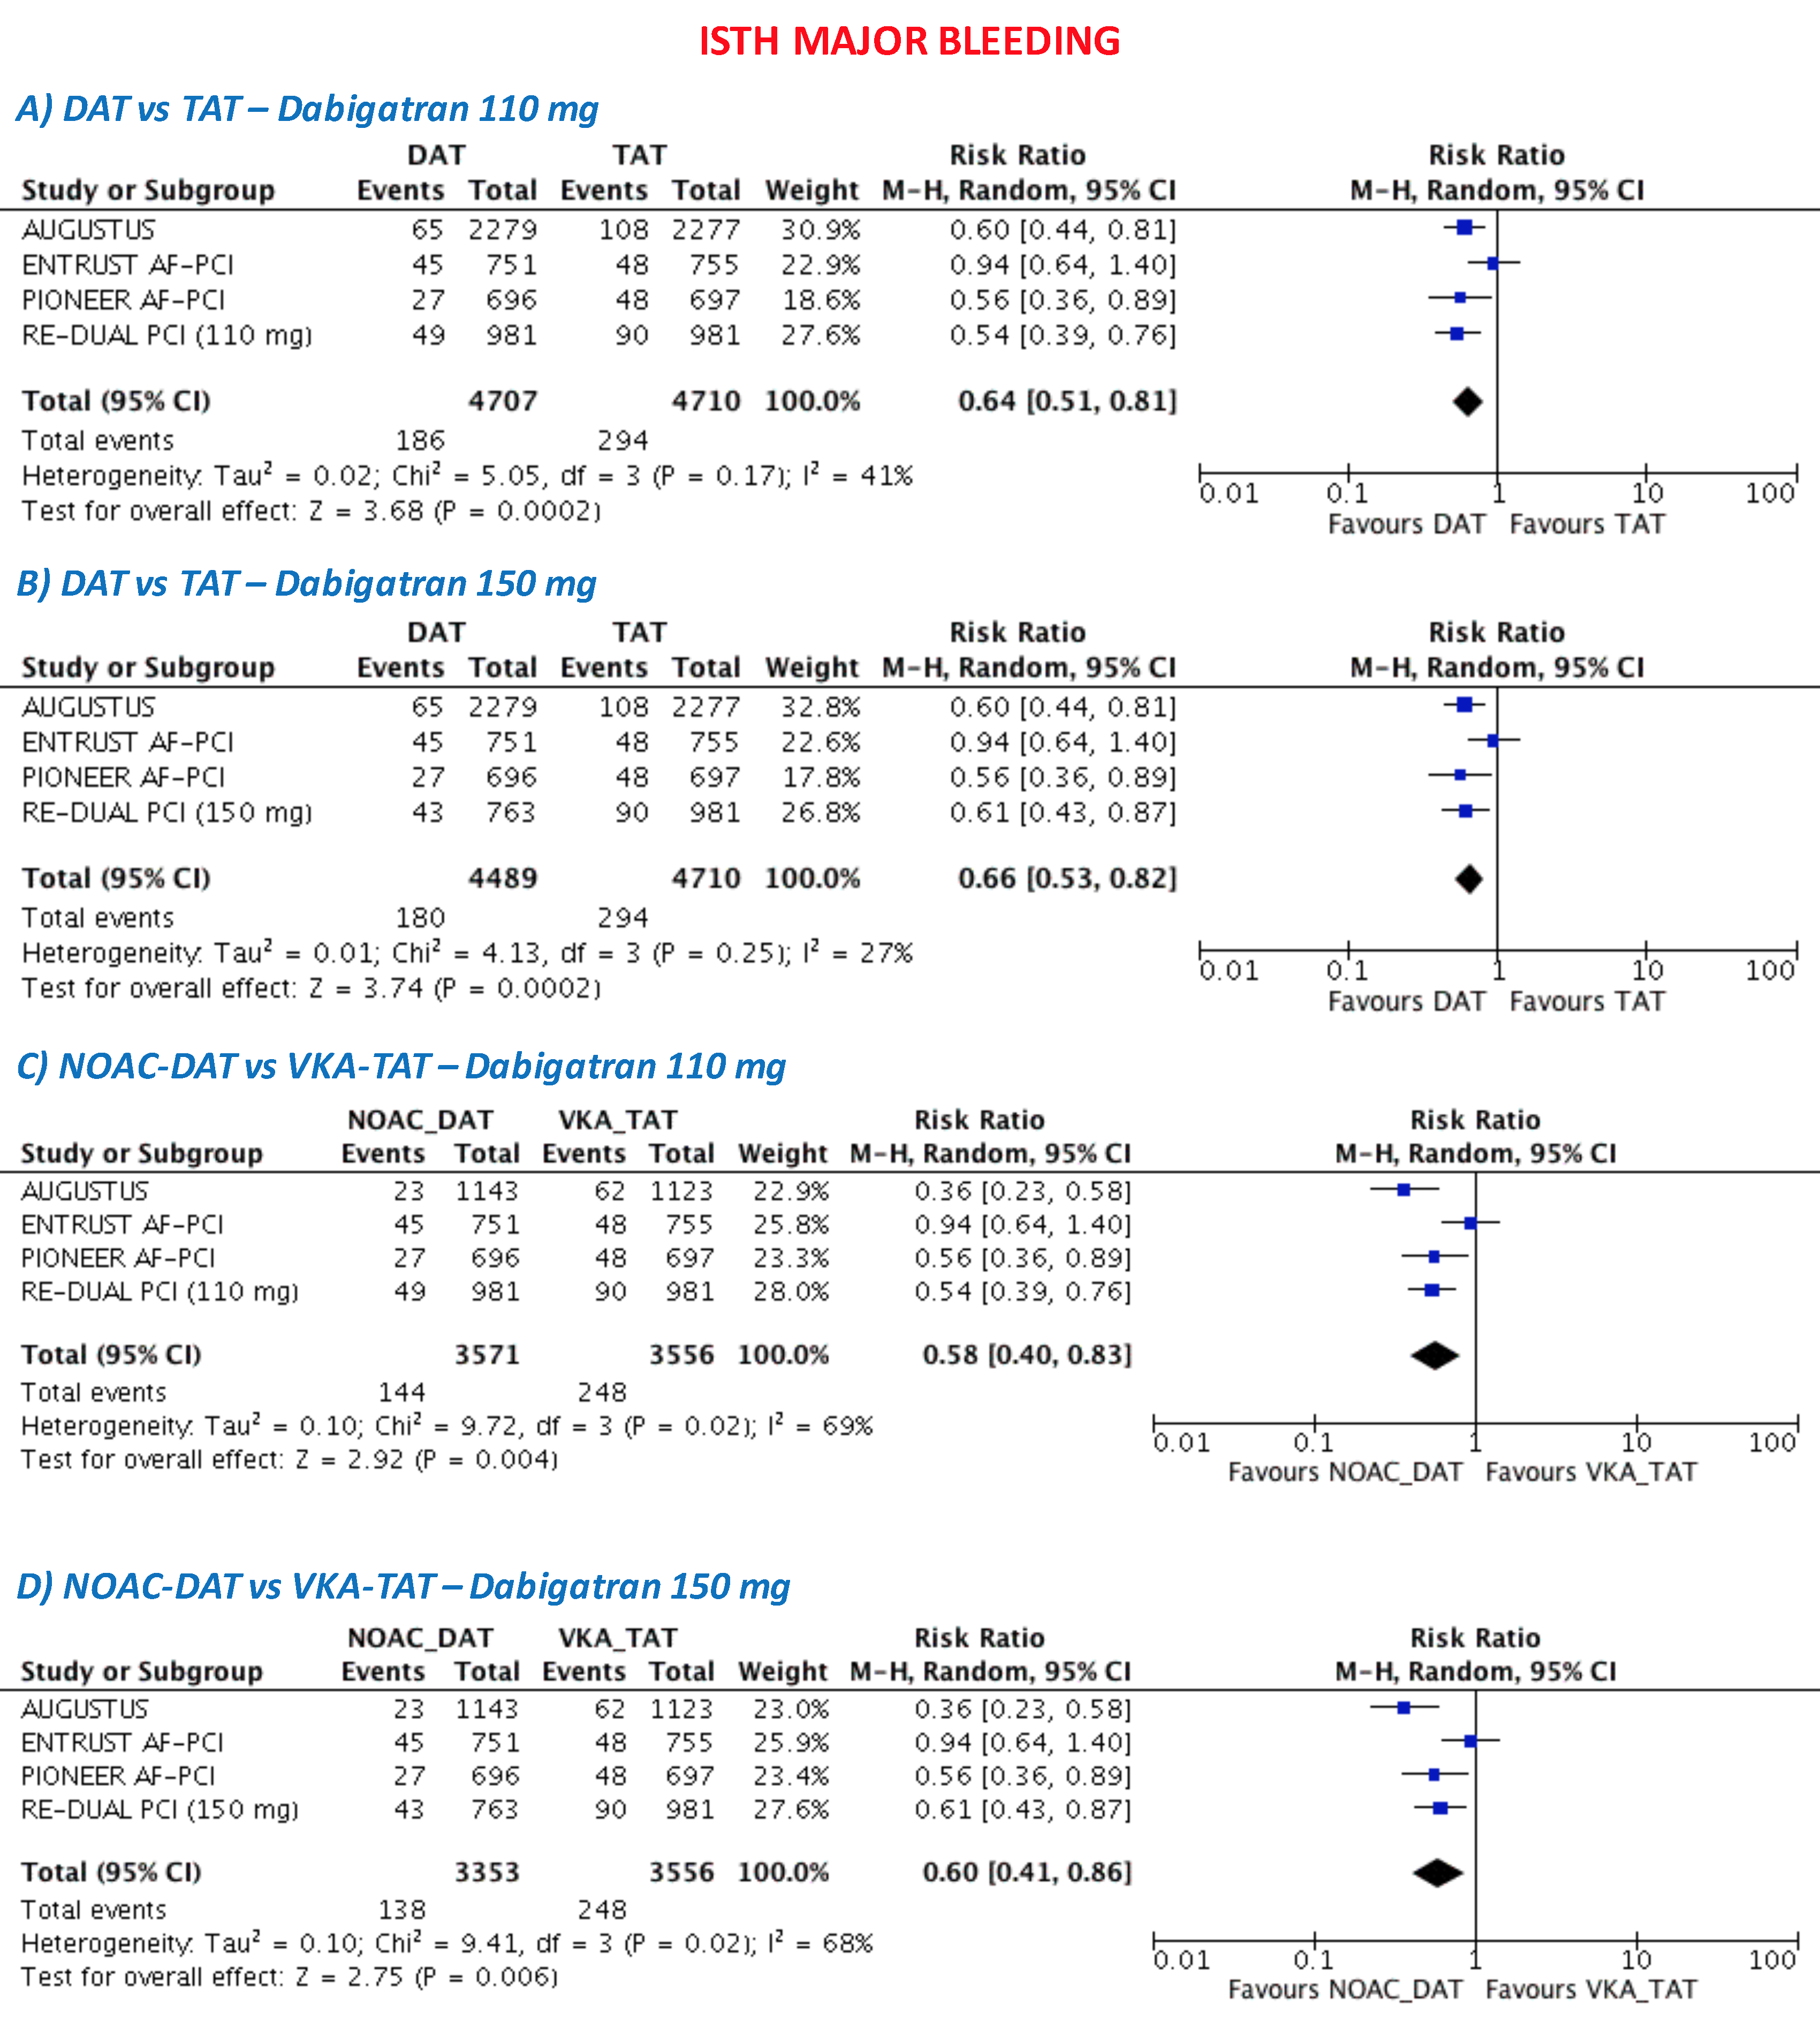
**

**Supplementary Figure 6. Clinically relevant nonmajor bleeding in DAT vs TAT and in NOAC-based DAT vs VKA-based TAT according to dabigatran doses.**

**
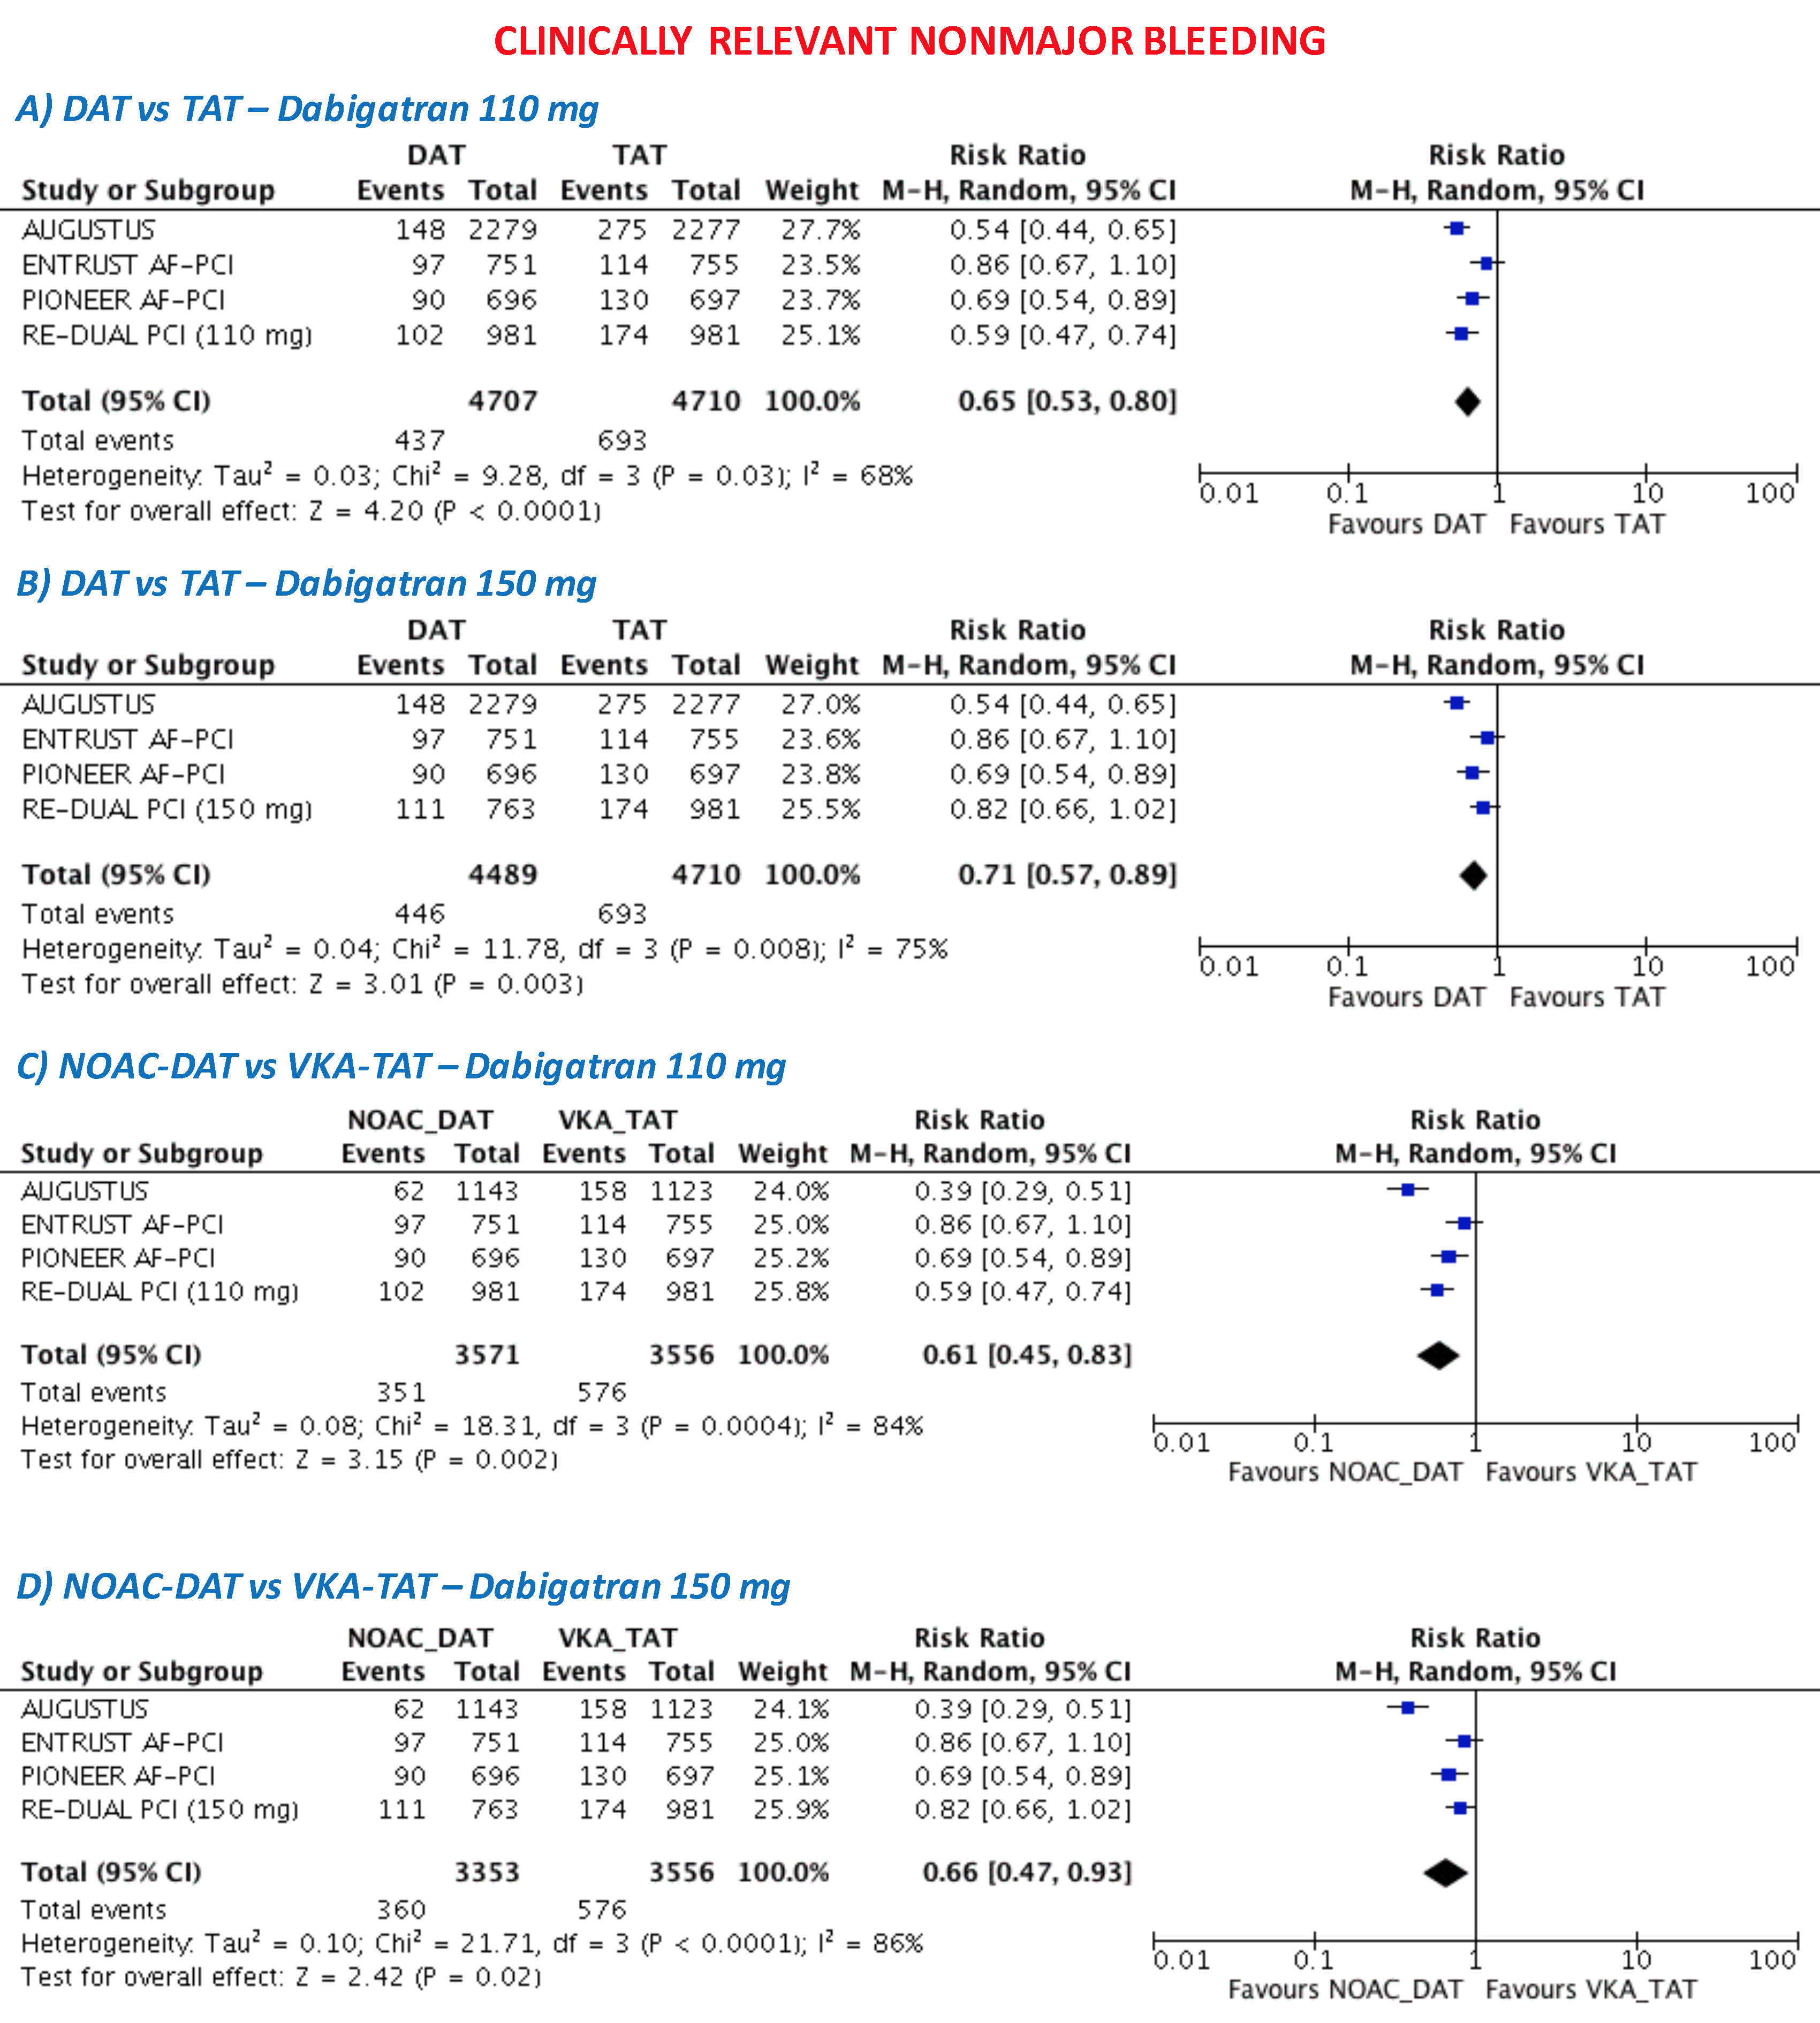
**

**Supplementary Figure 7. Intracranial haemorrhage in DAT vs TAT and in NOAC-based DAT vs VKA-based TAT according to dabigatran doses.**

**
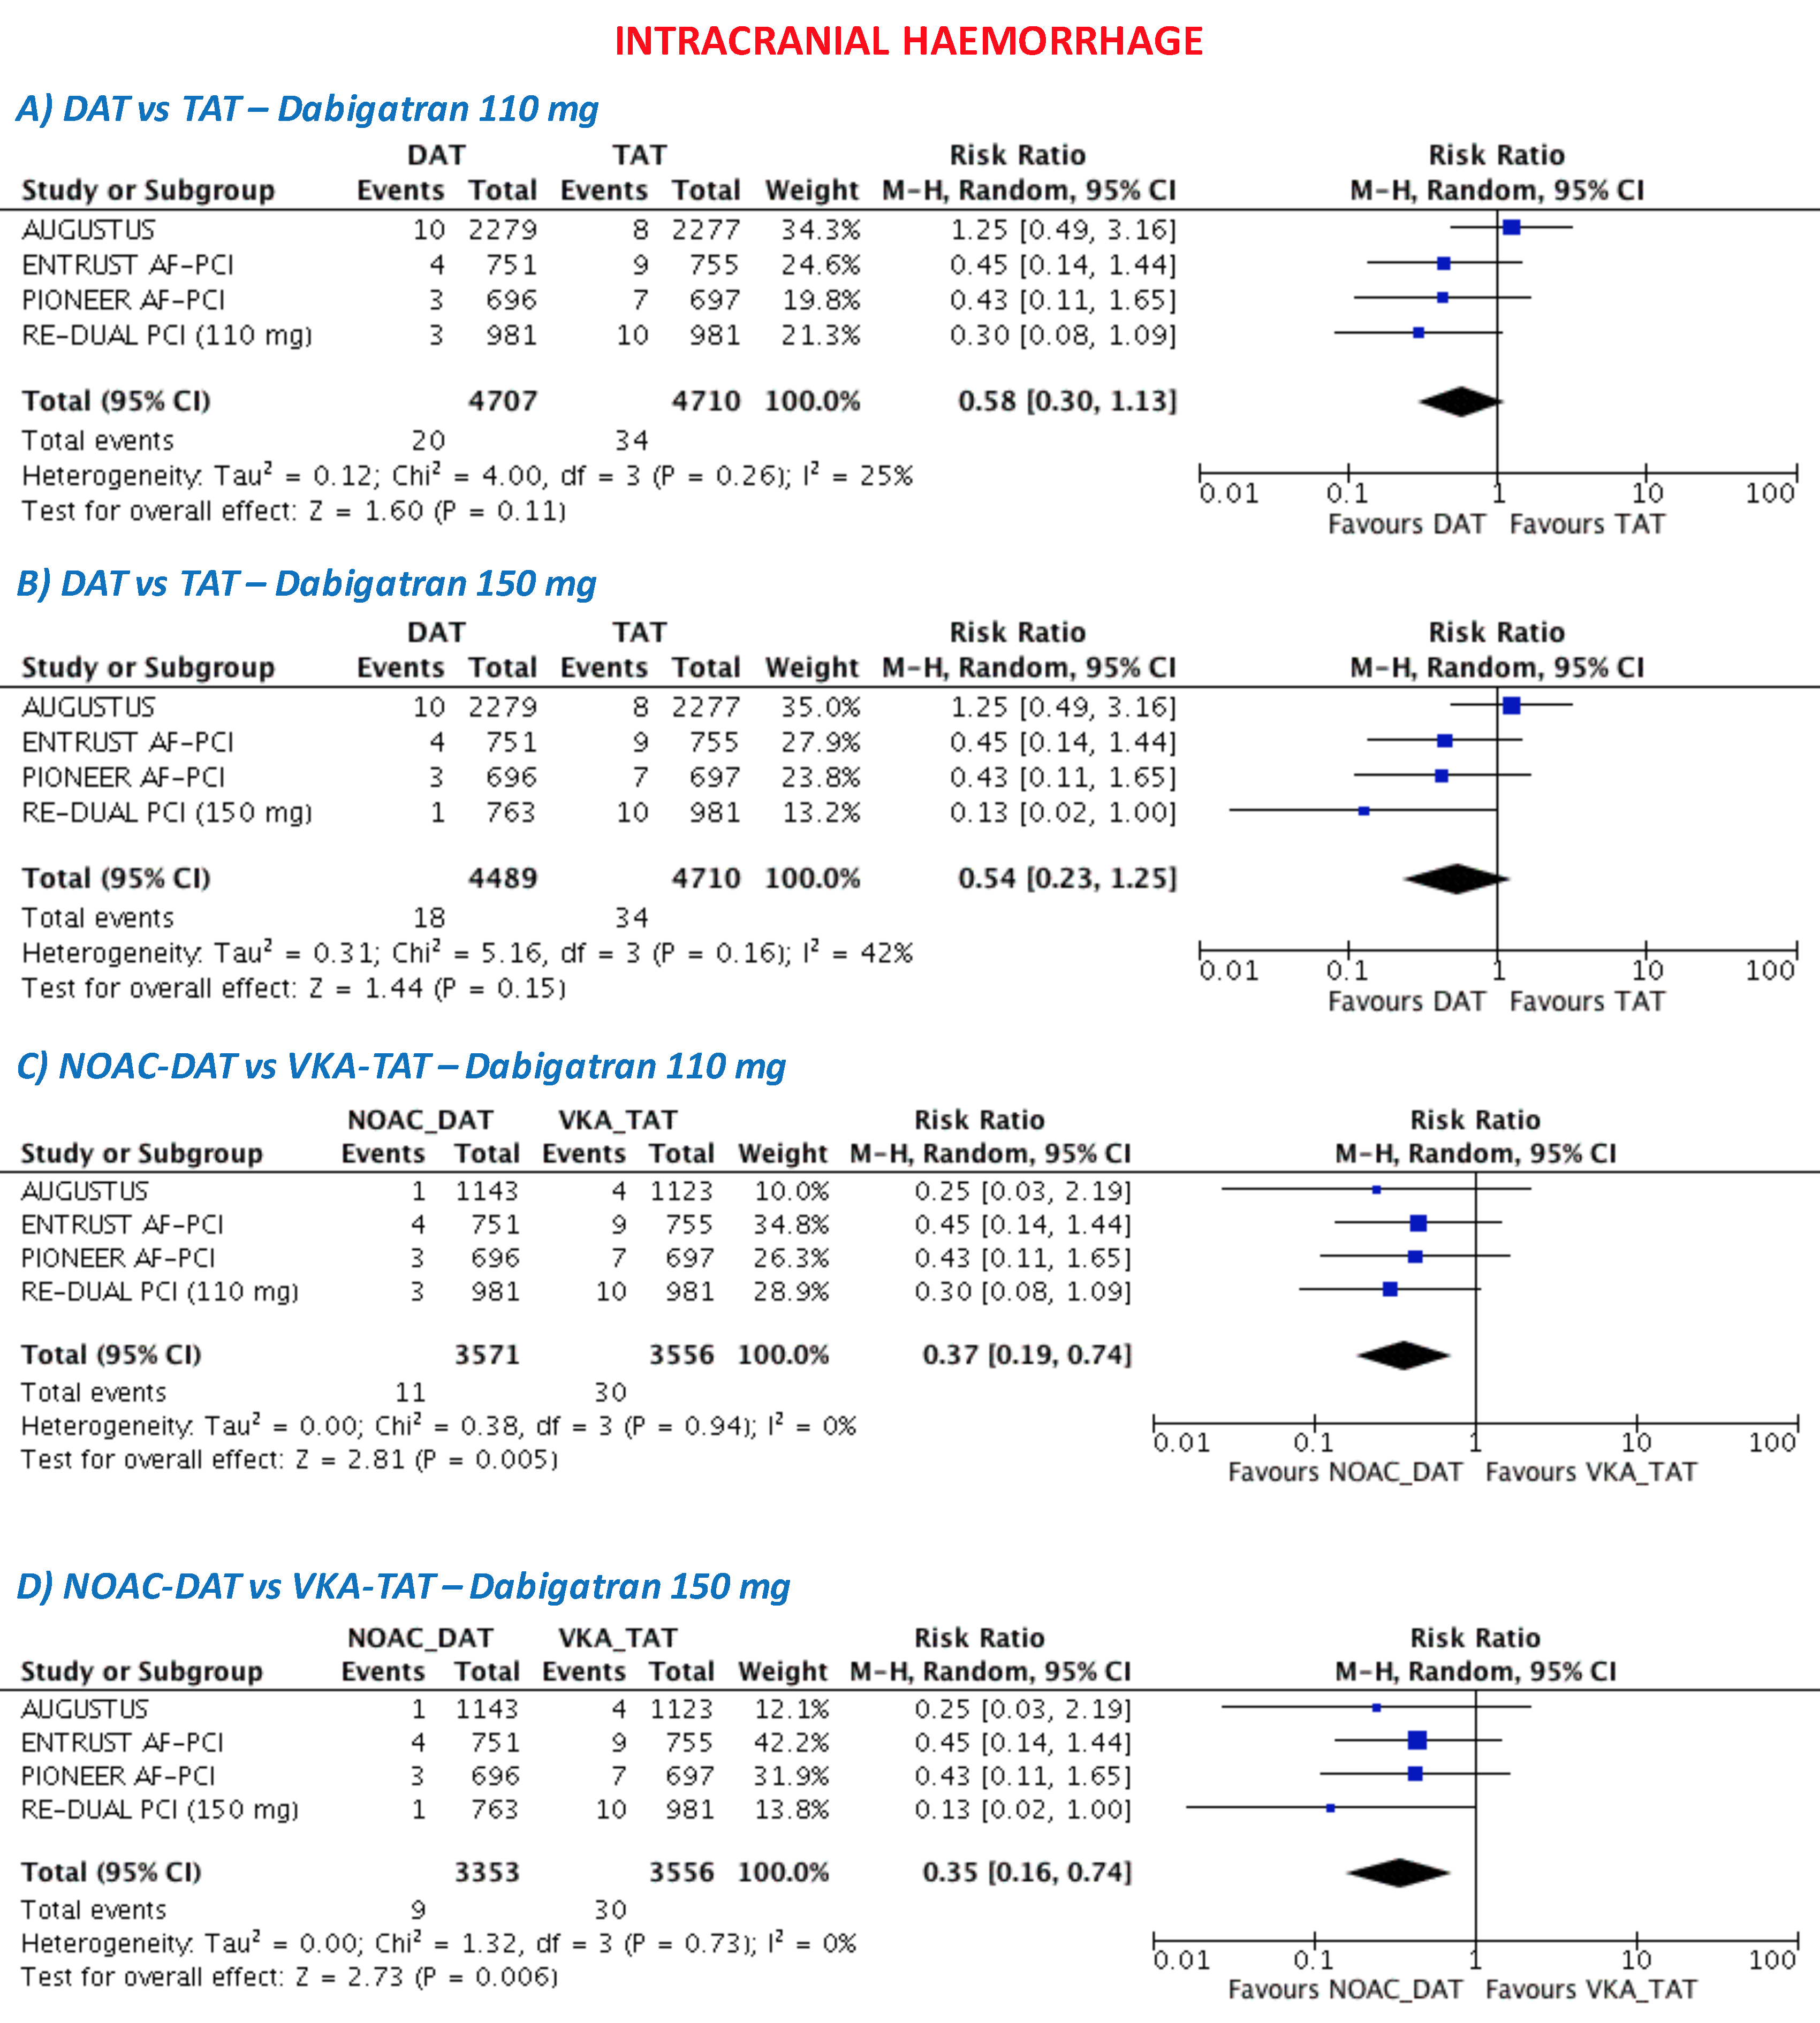
**

**Supplementary Figure 8. TIMI major bleeding in DAT vs TAT and in NOAC-based DAT vs VKA-based TAT according to dabigatran doses.**

**
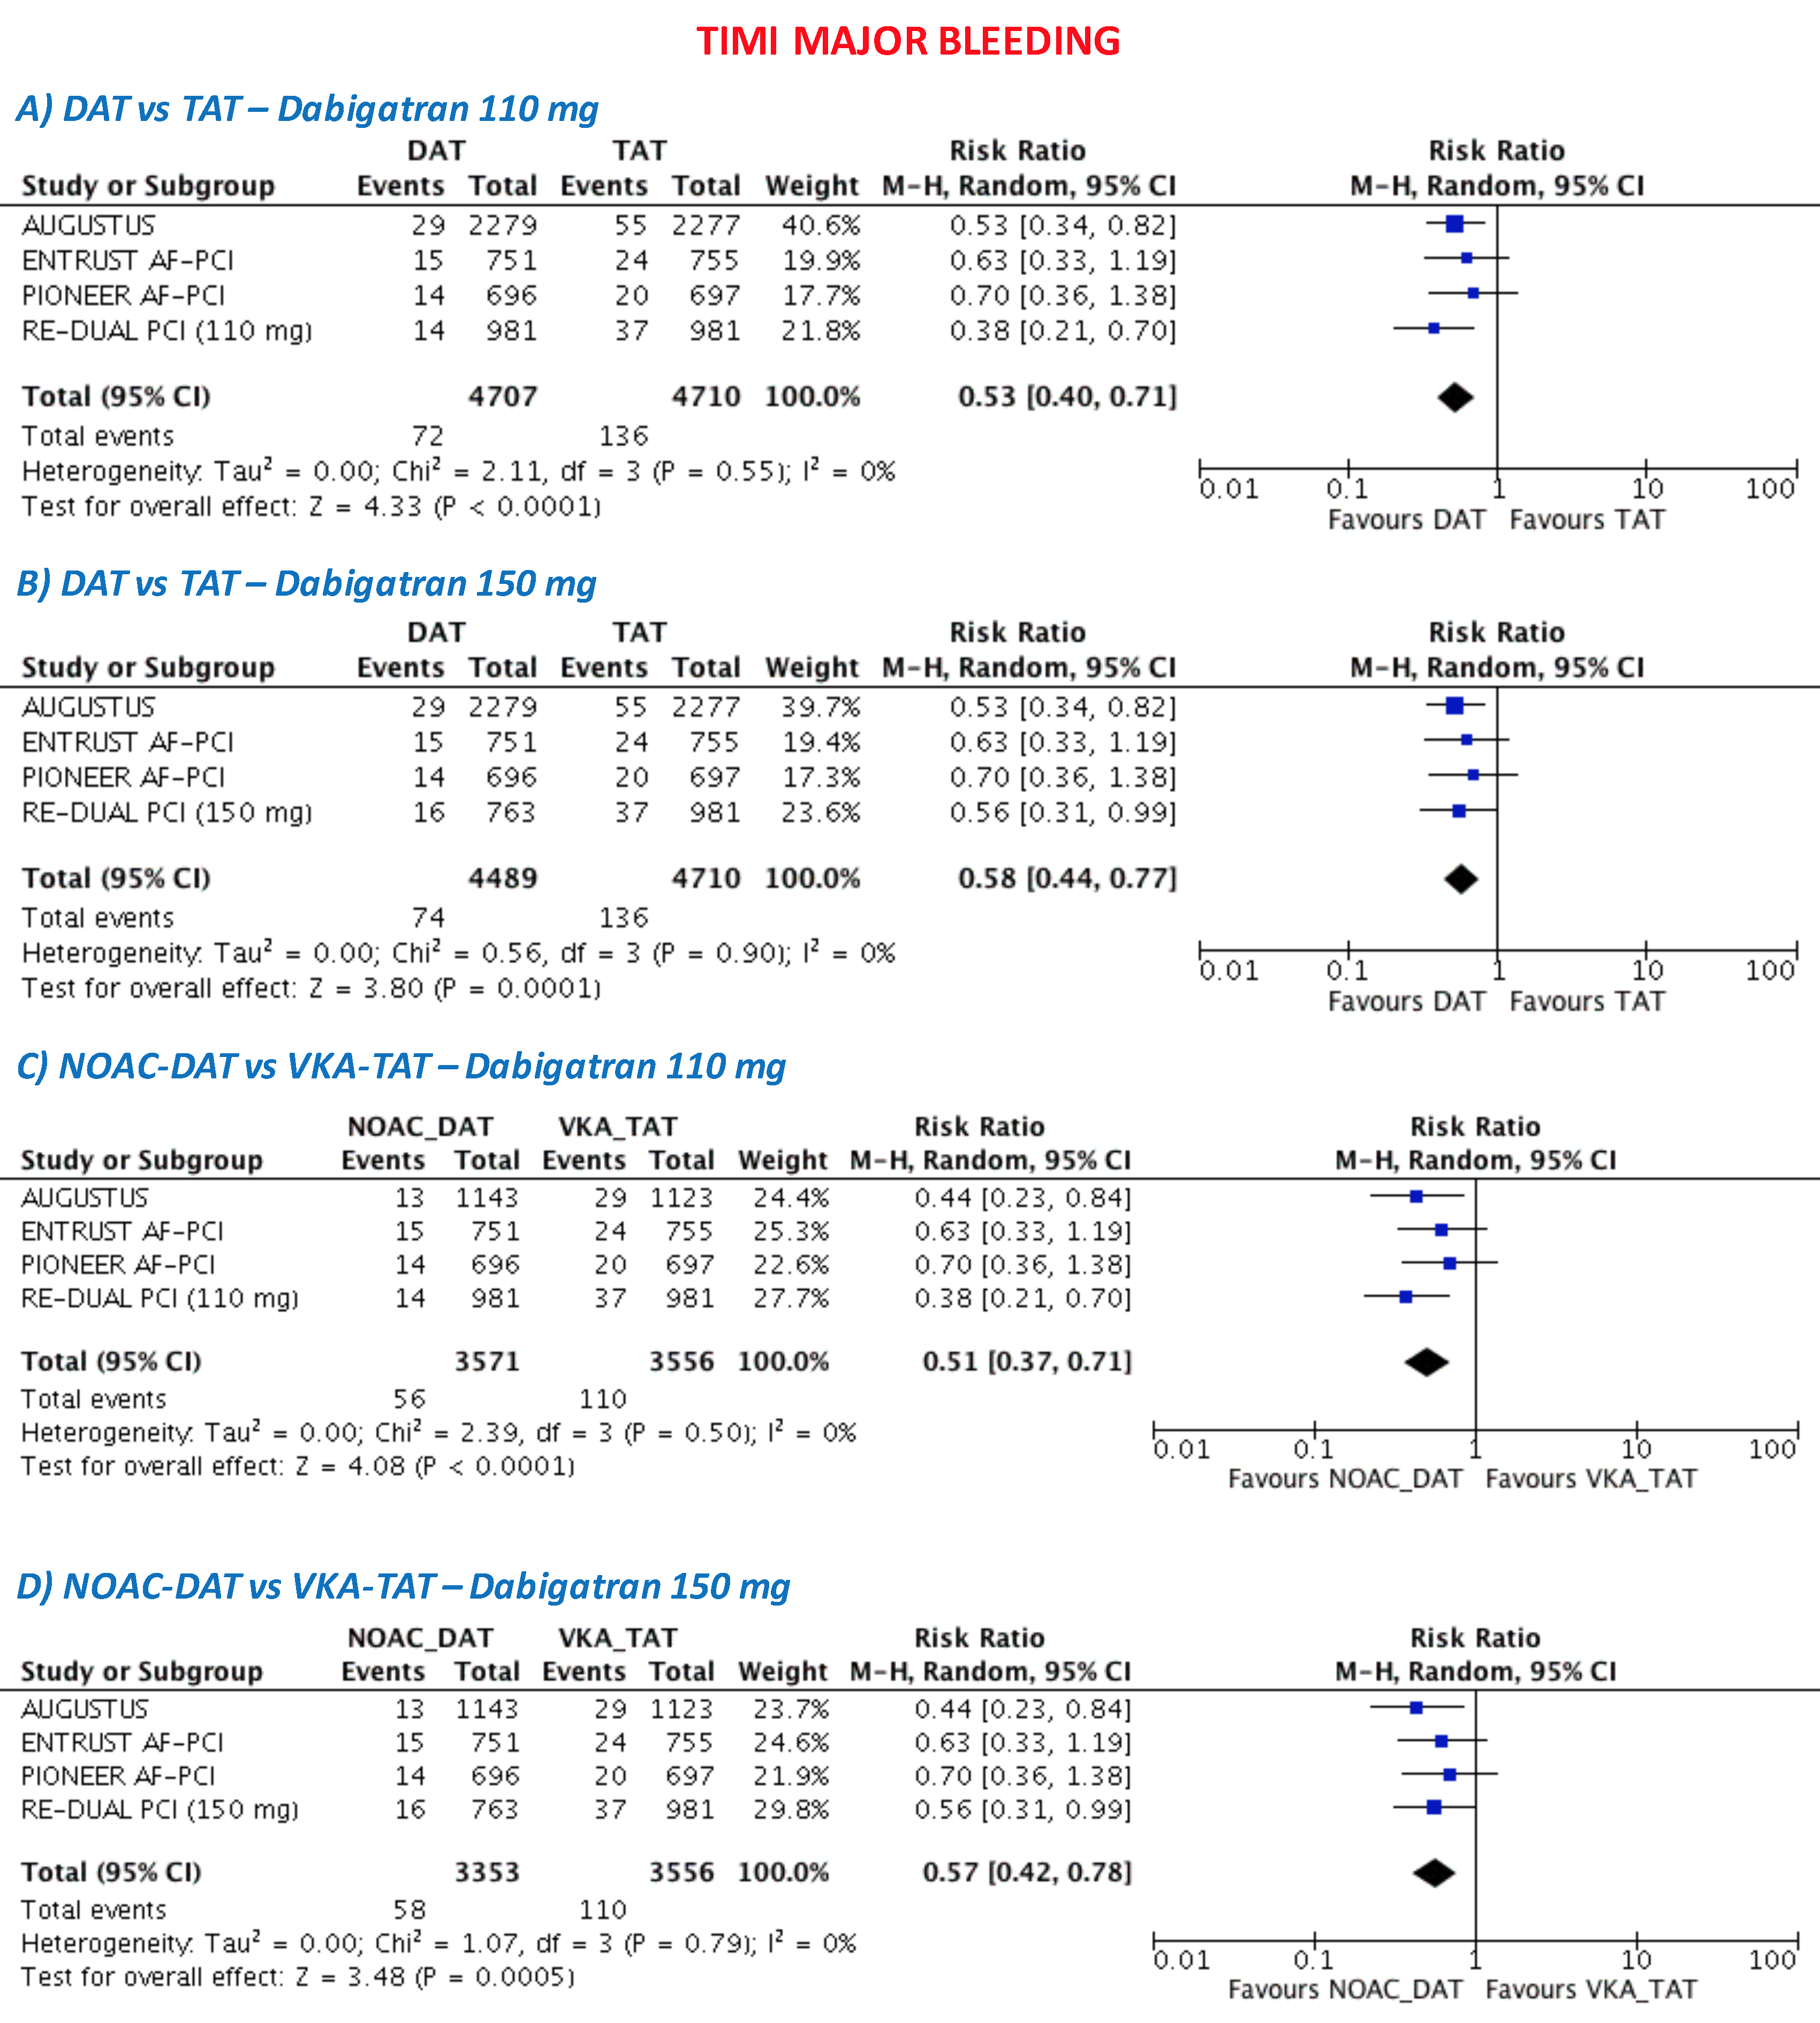
**

**Supplementary Figure 9. TIMI major or minor bleeding in DAT vs TAT and in NOAC-based DAT vs VKA-based TAT according to dabigatran doses.**

**
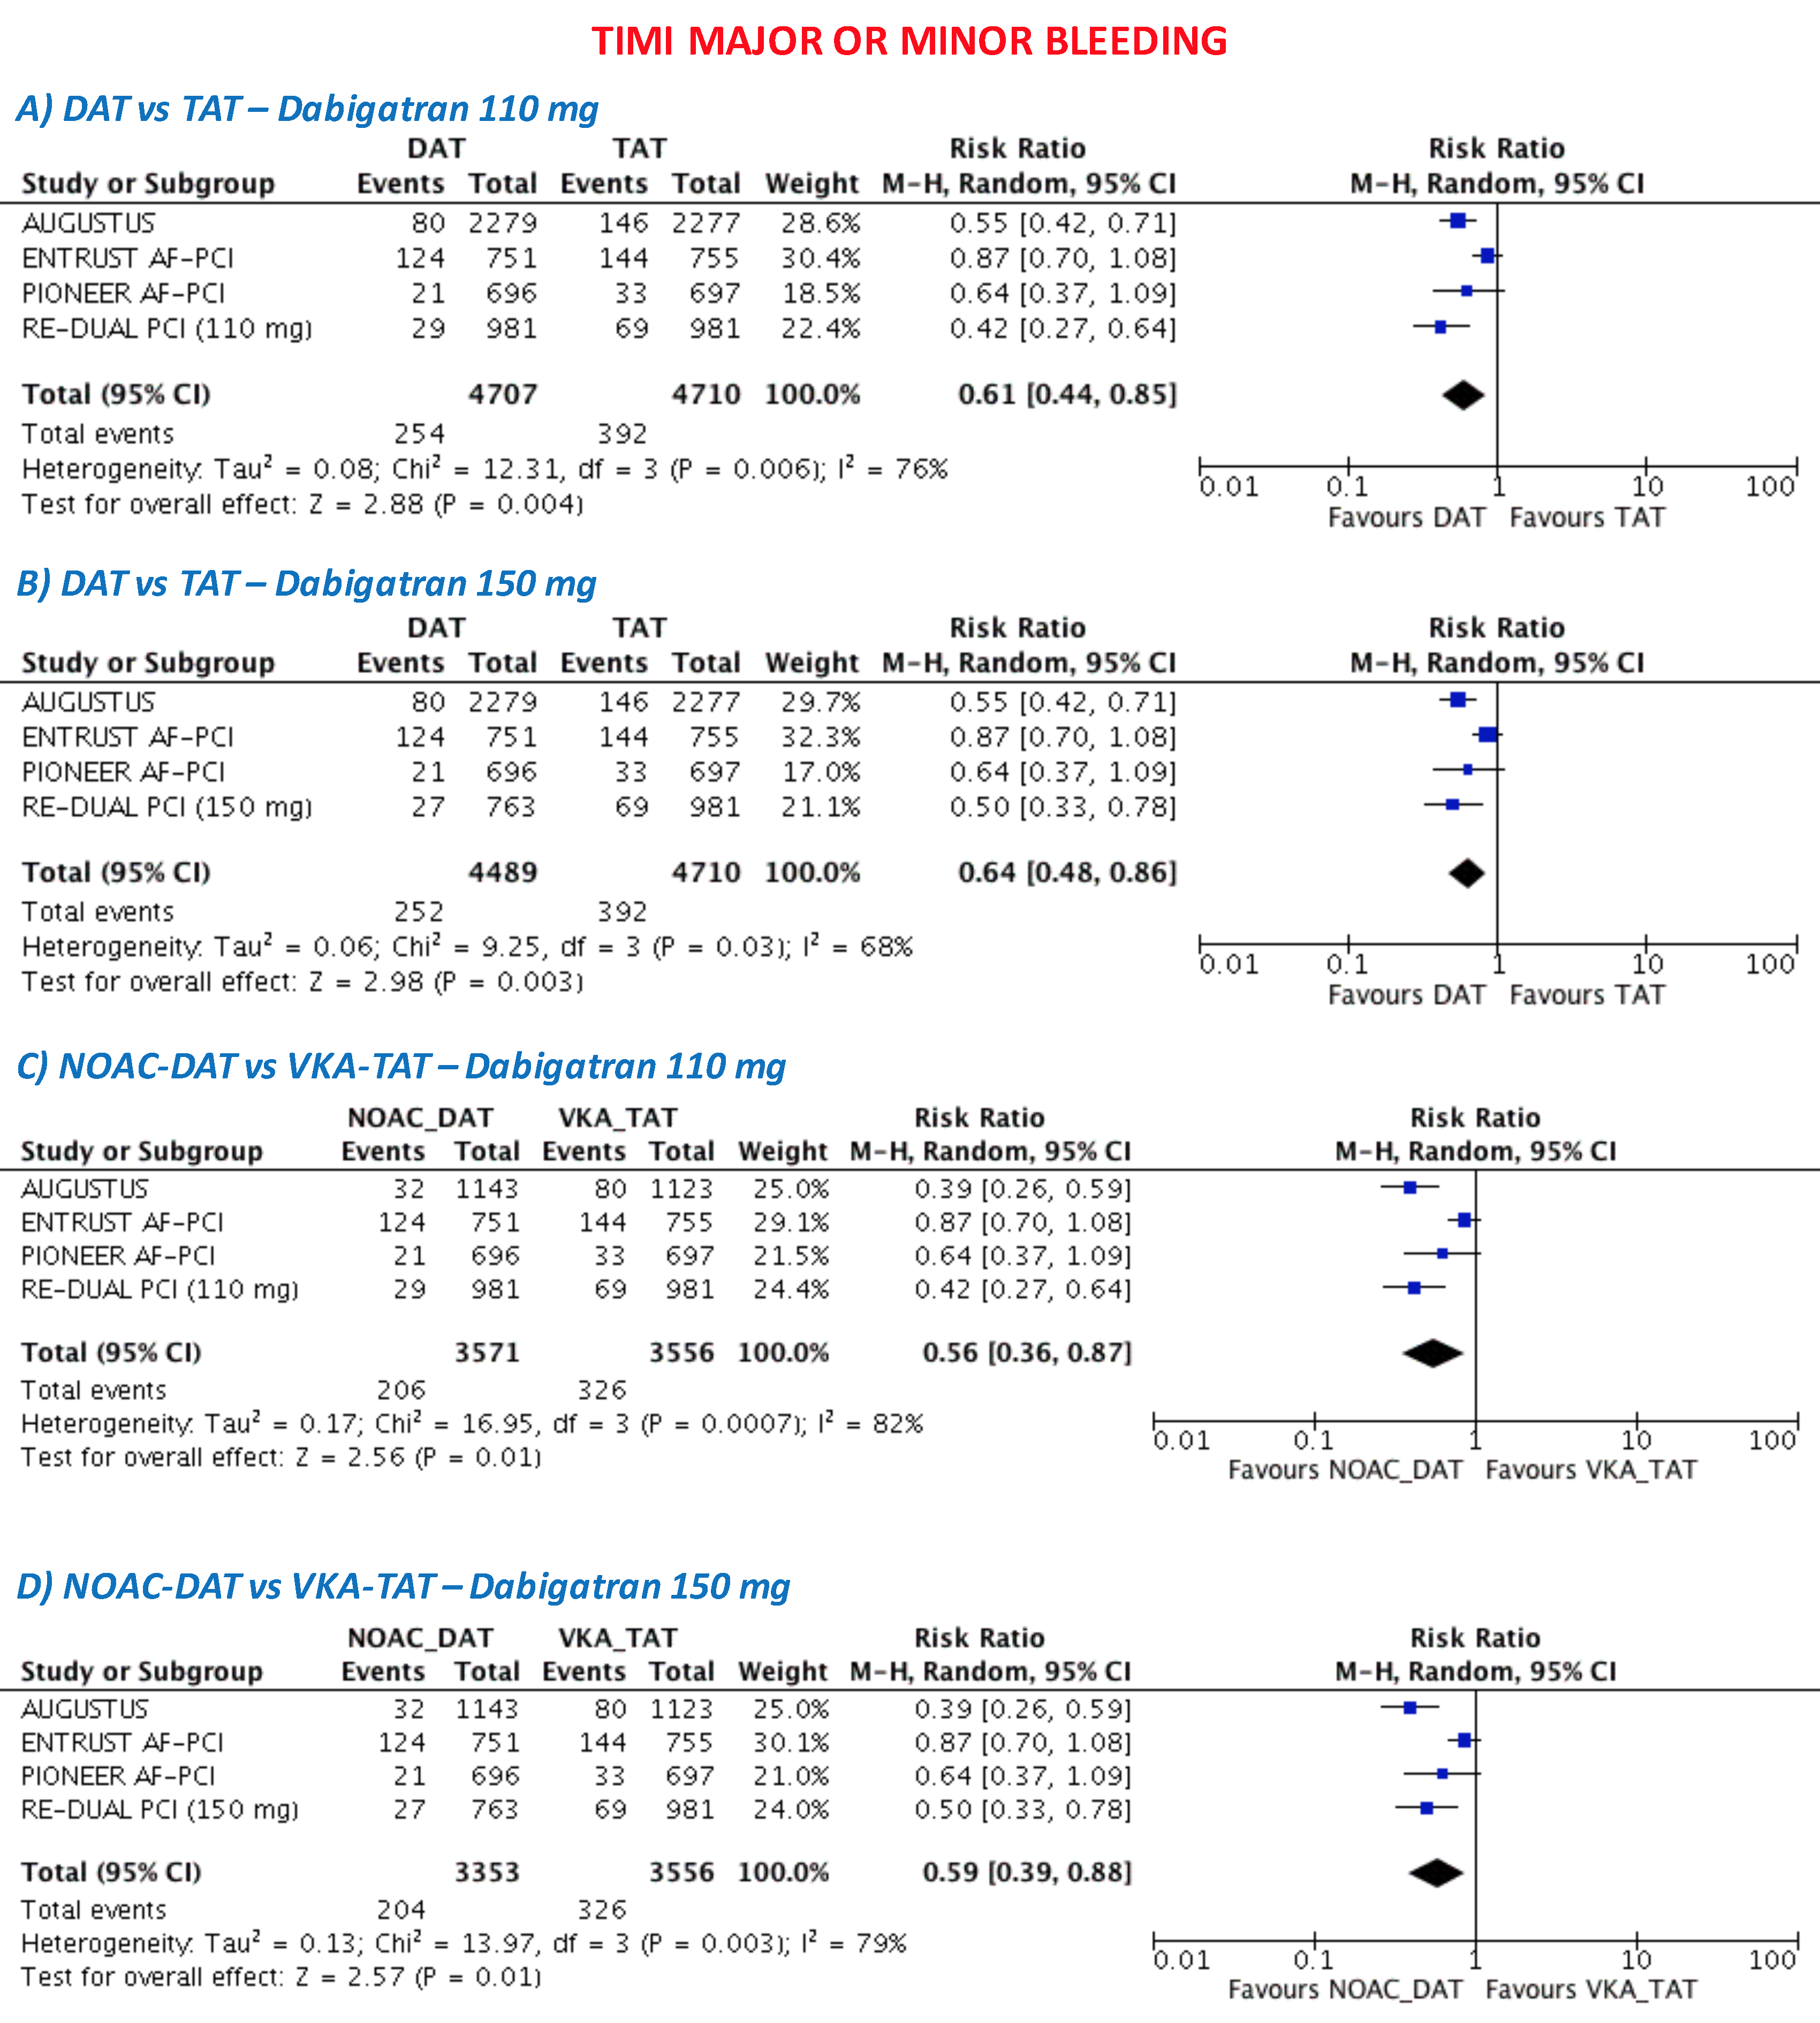
**

**Supplementary Figure 10. All-cause death in DAT vs TAT and in NOAC-based DAT vs VKA-based TAT according to dabigatran doses.**

**
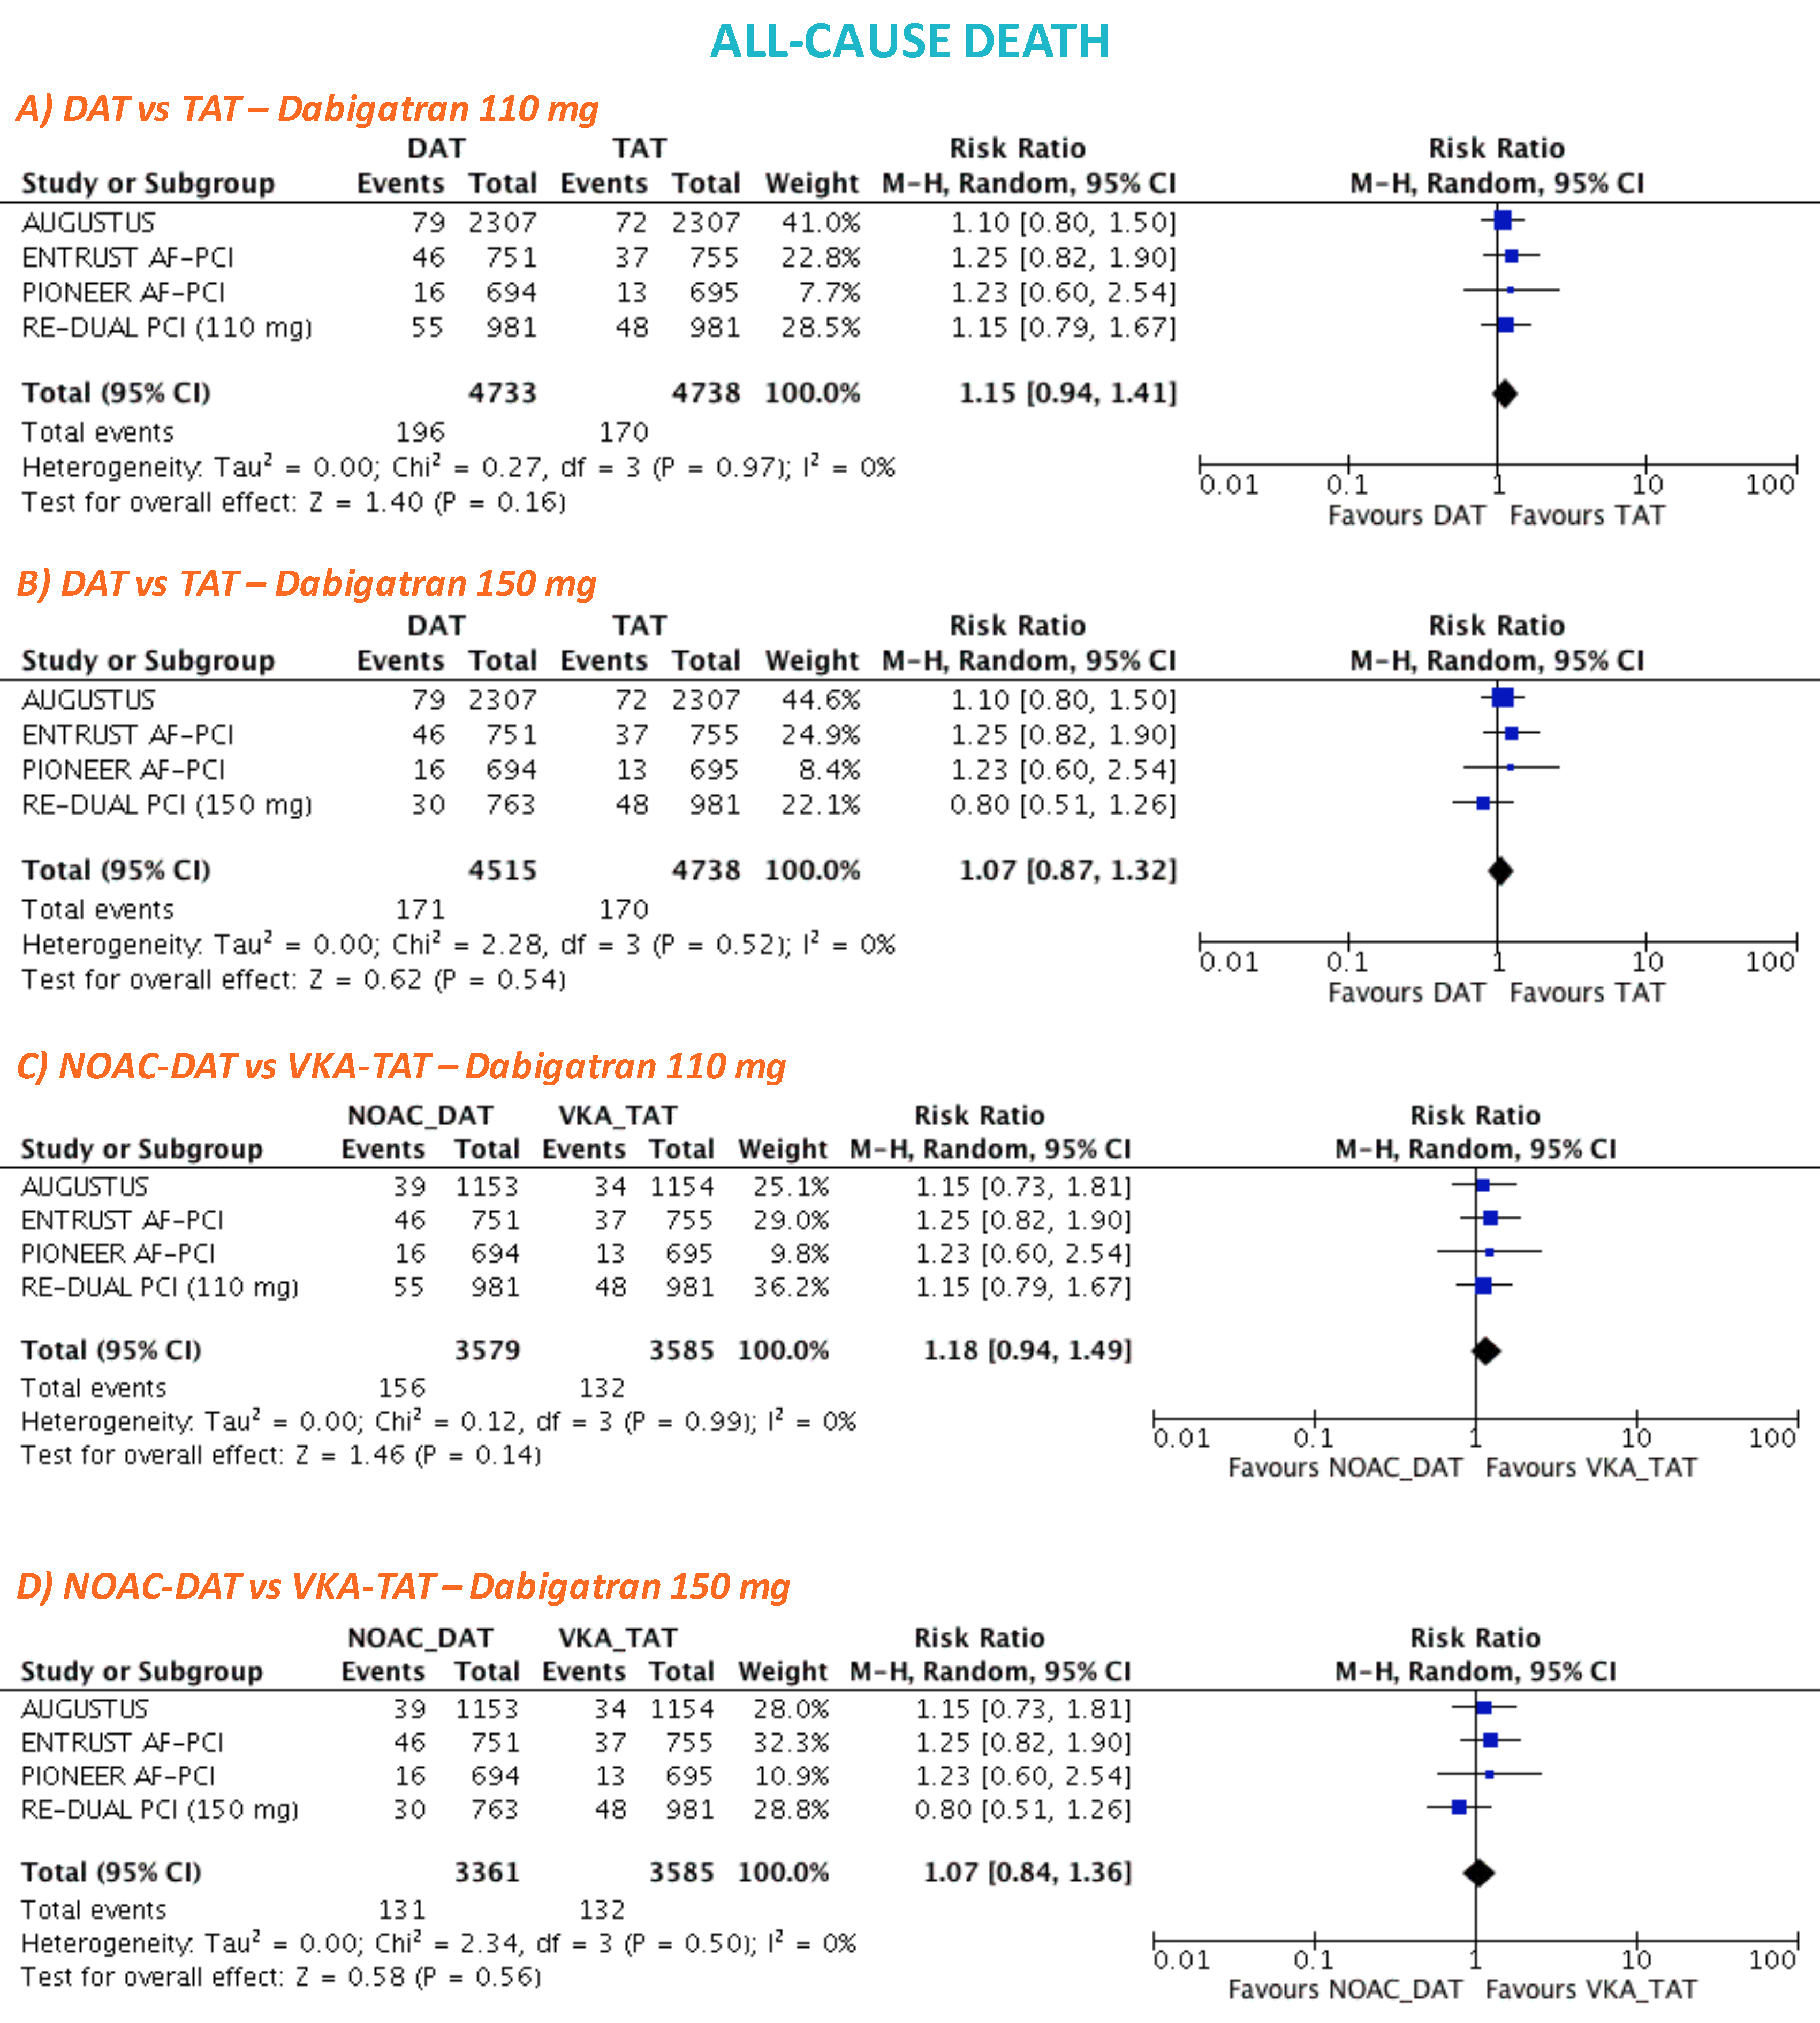
**

**Supplementary Figure 11. Cardiovascular death in DAT vs TAT and in NOAC-based DAT vs VKA-based TAT according to dabigatran doses.**

**
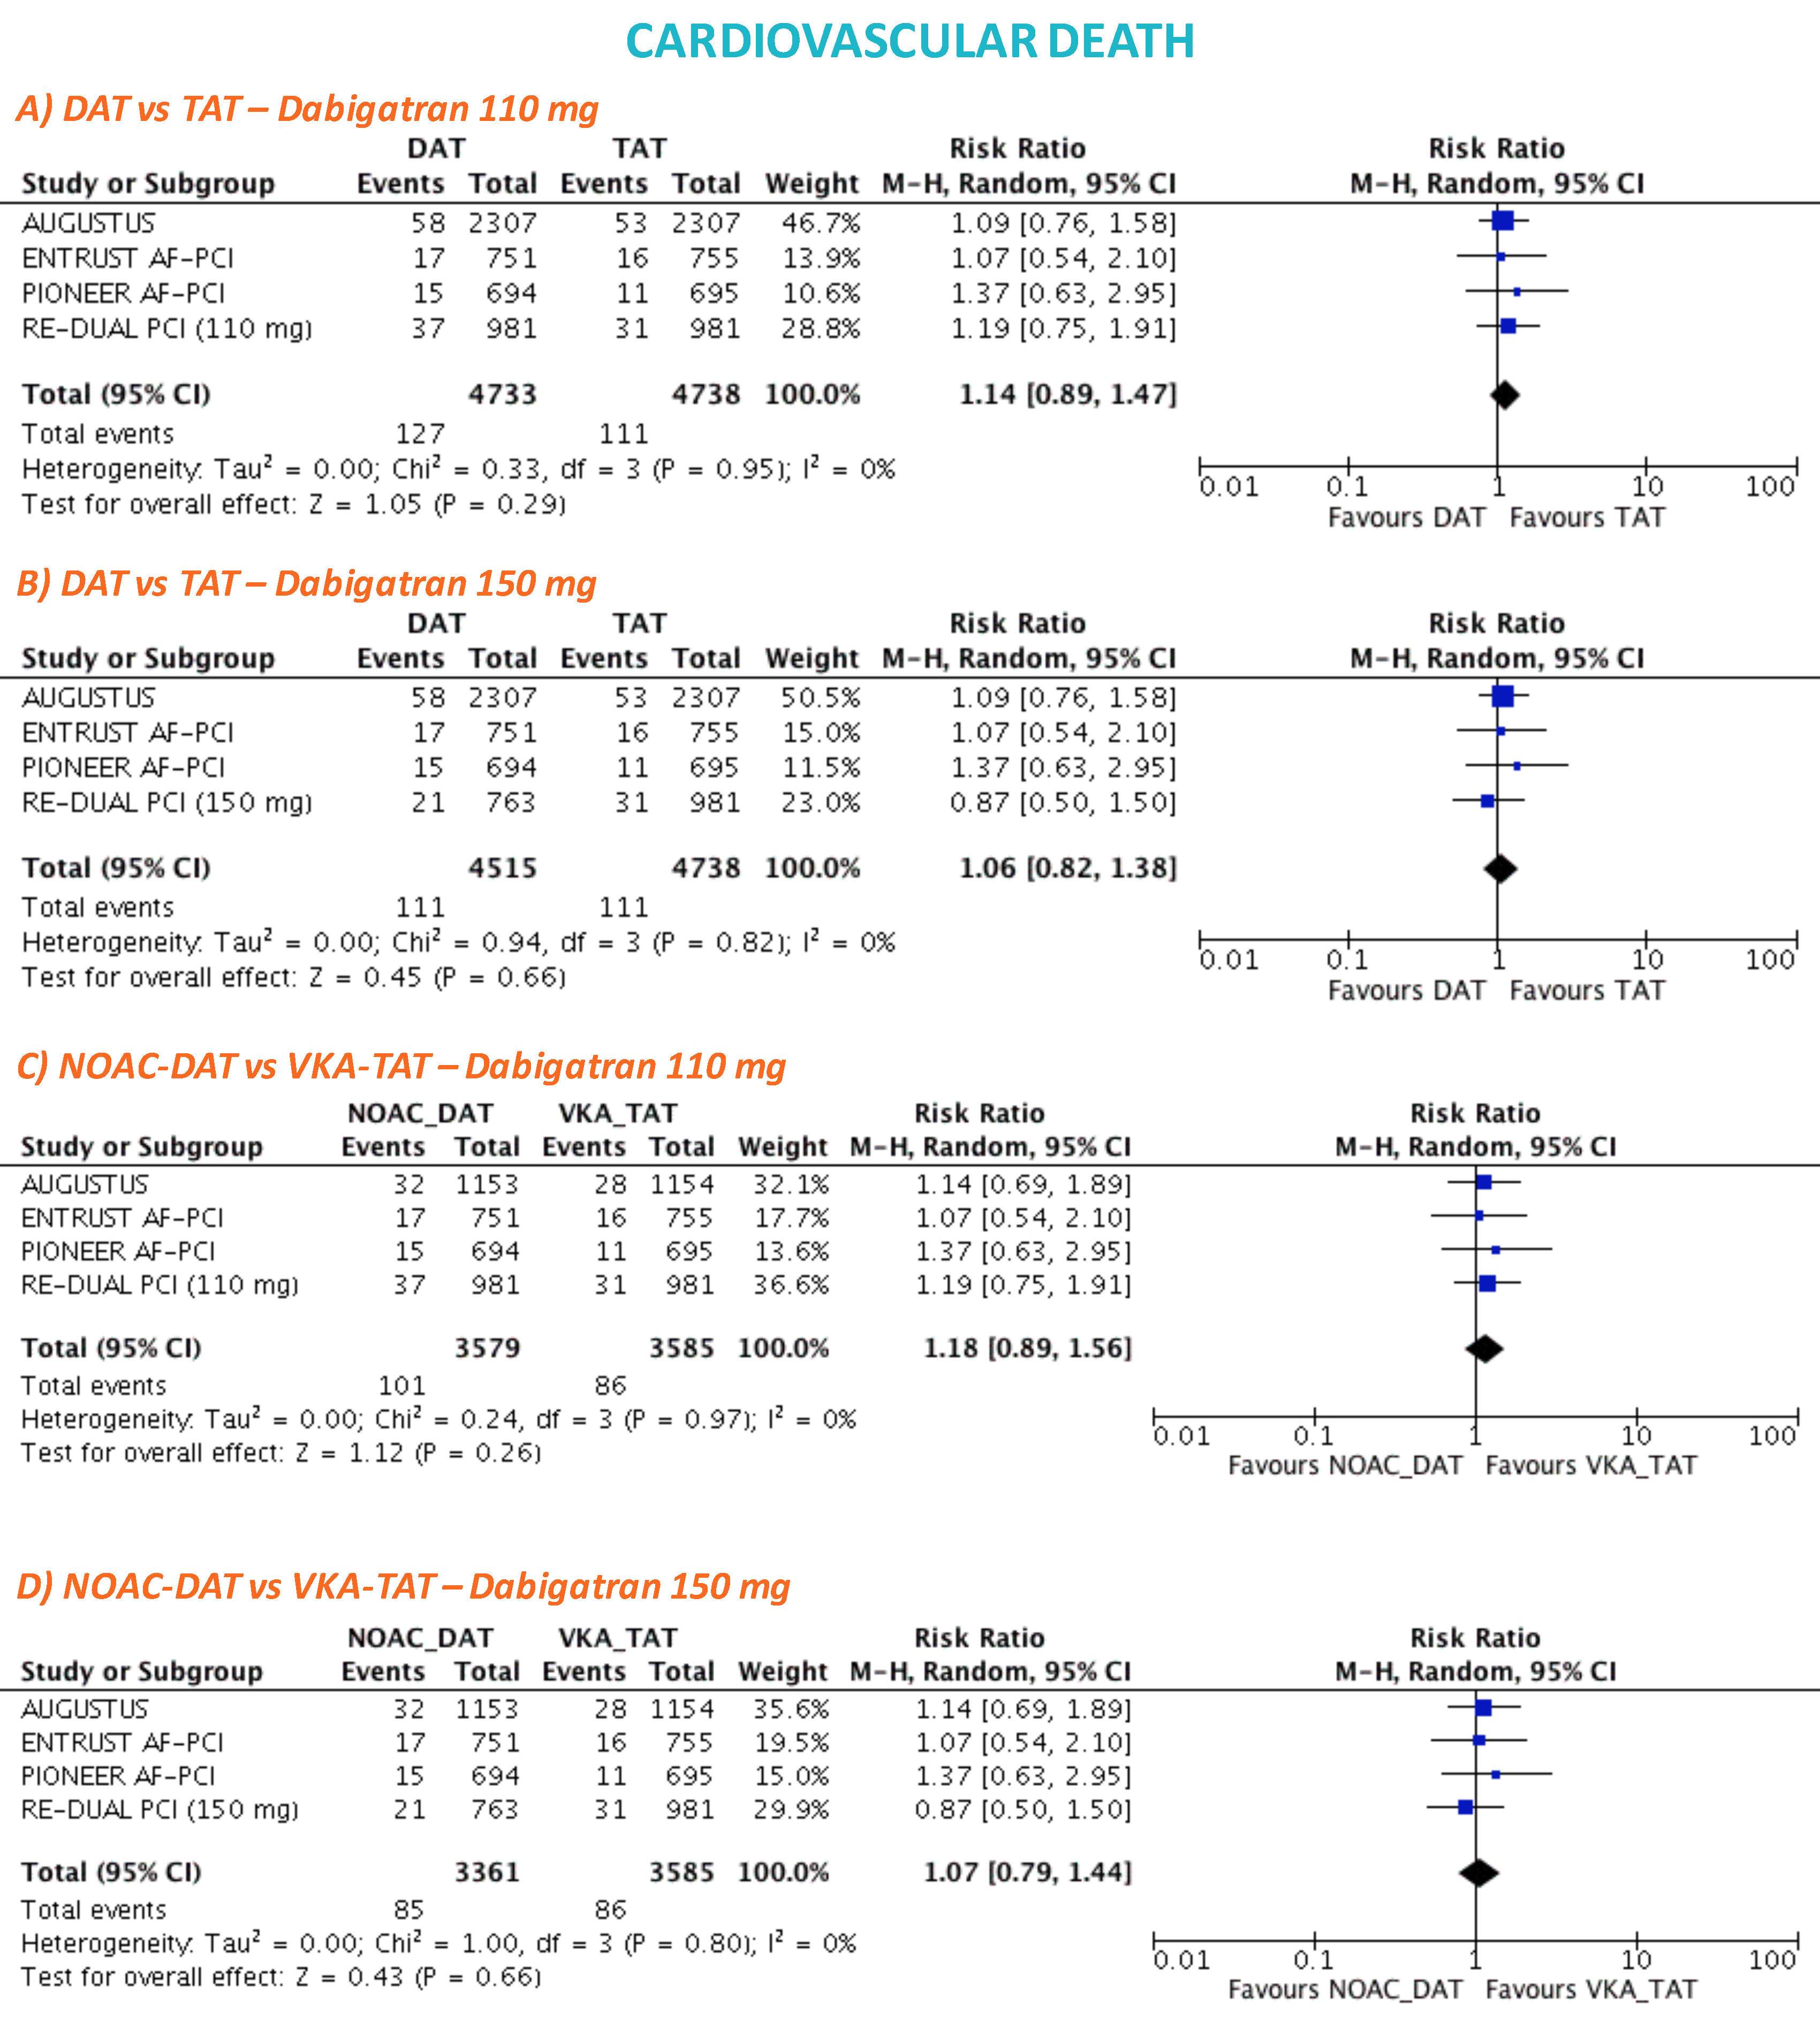
**

**Supplementary Figure 12. MACE (trial-defined) in DAT vs TAT and in NOAC-based DAT vs VKA-based TAT according to dabigatran doses.**

**
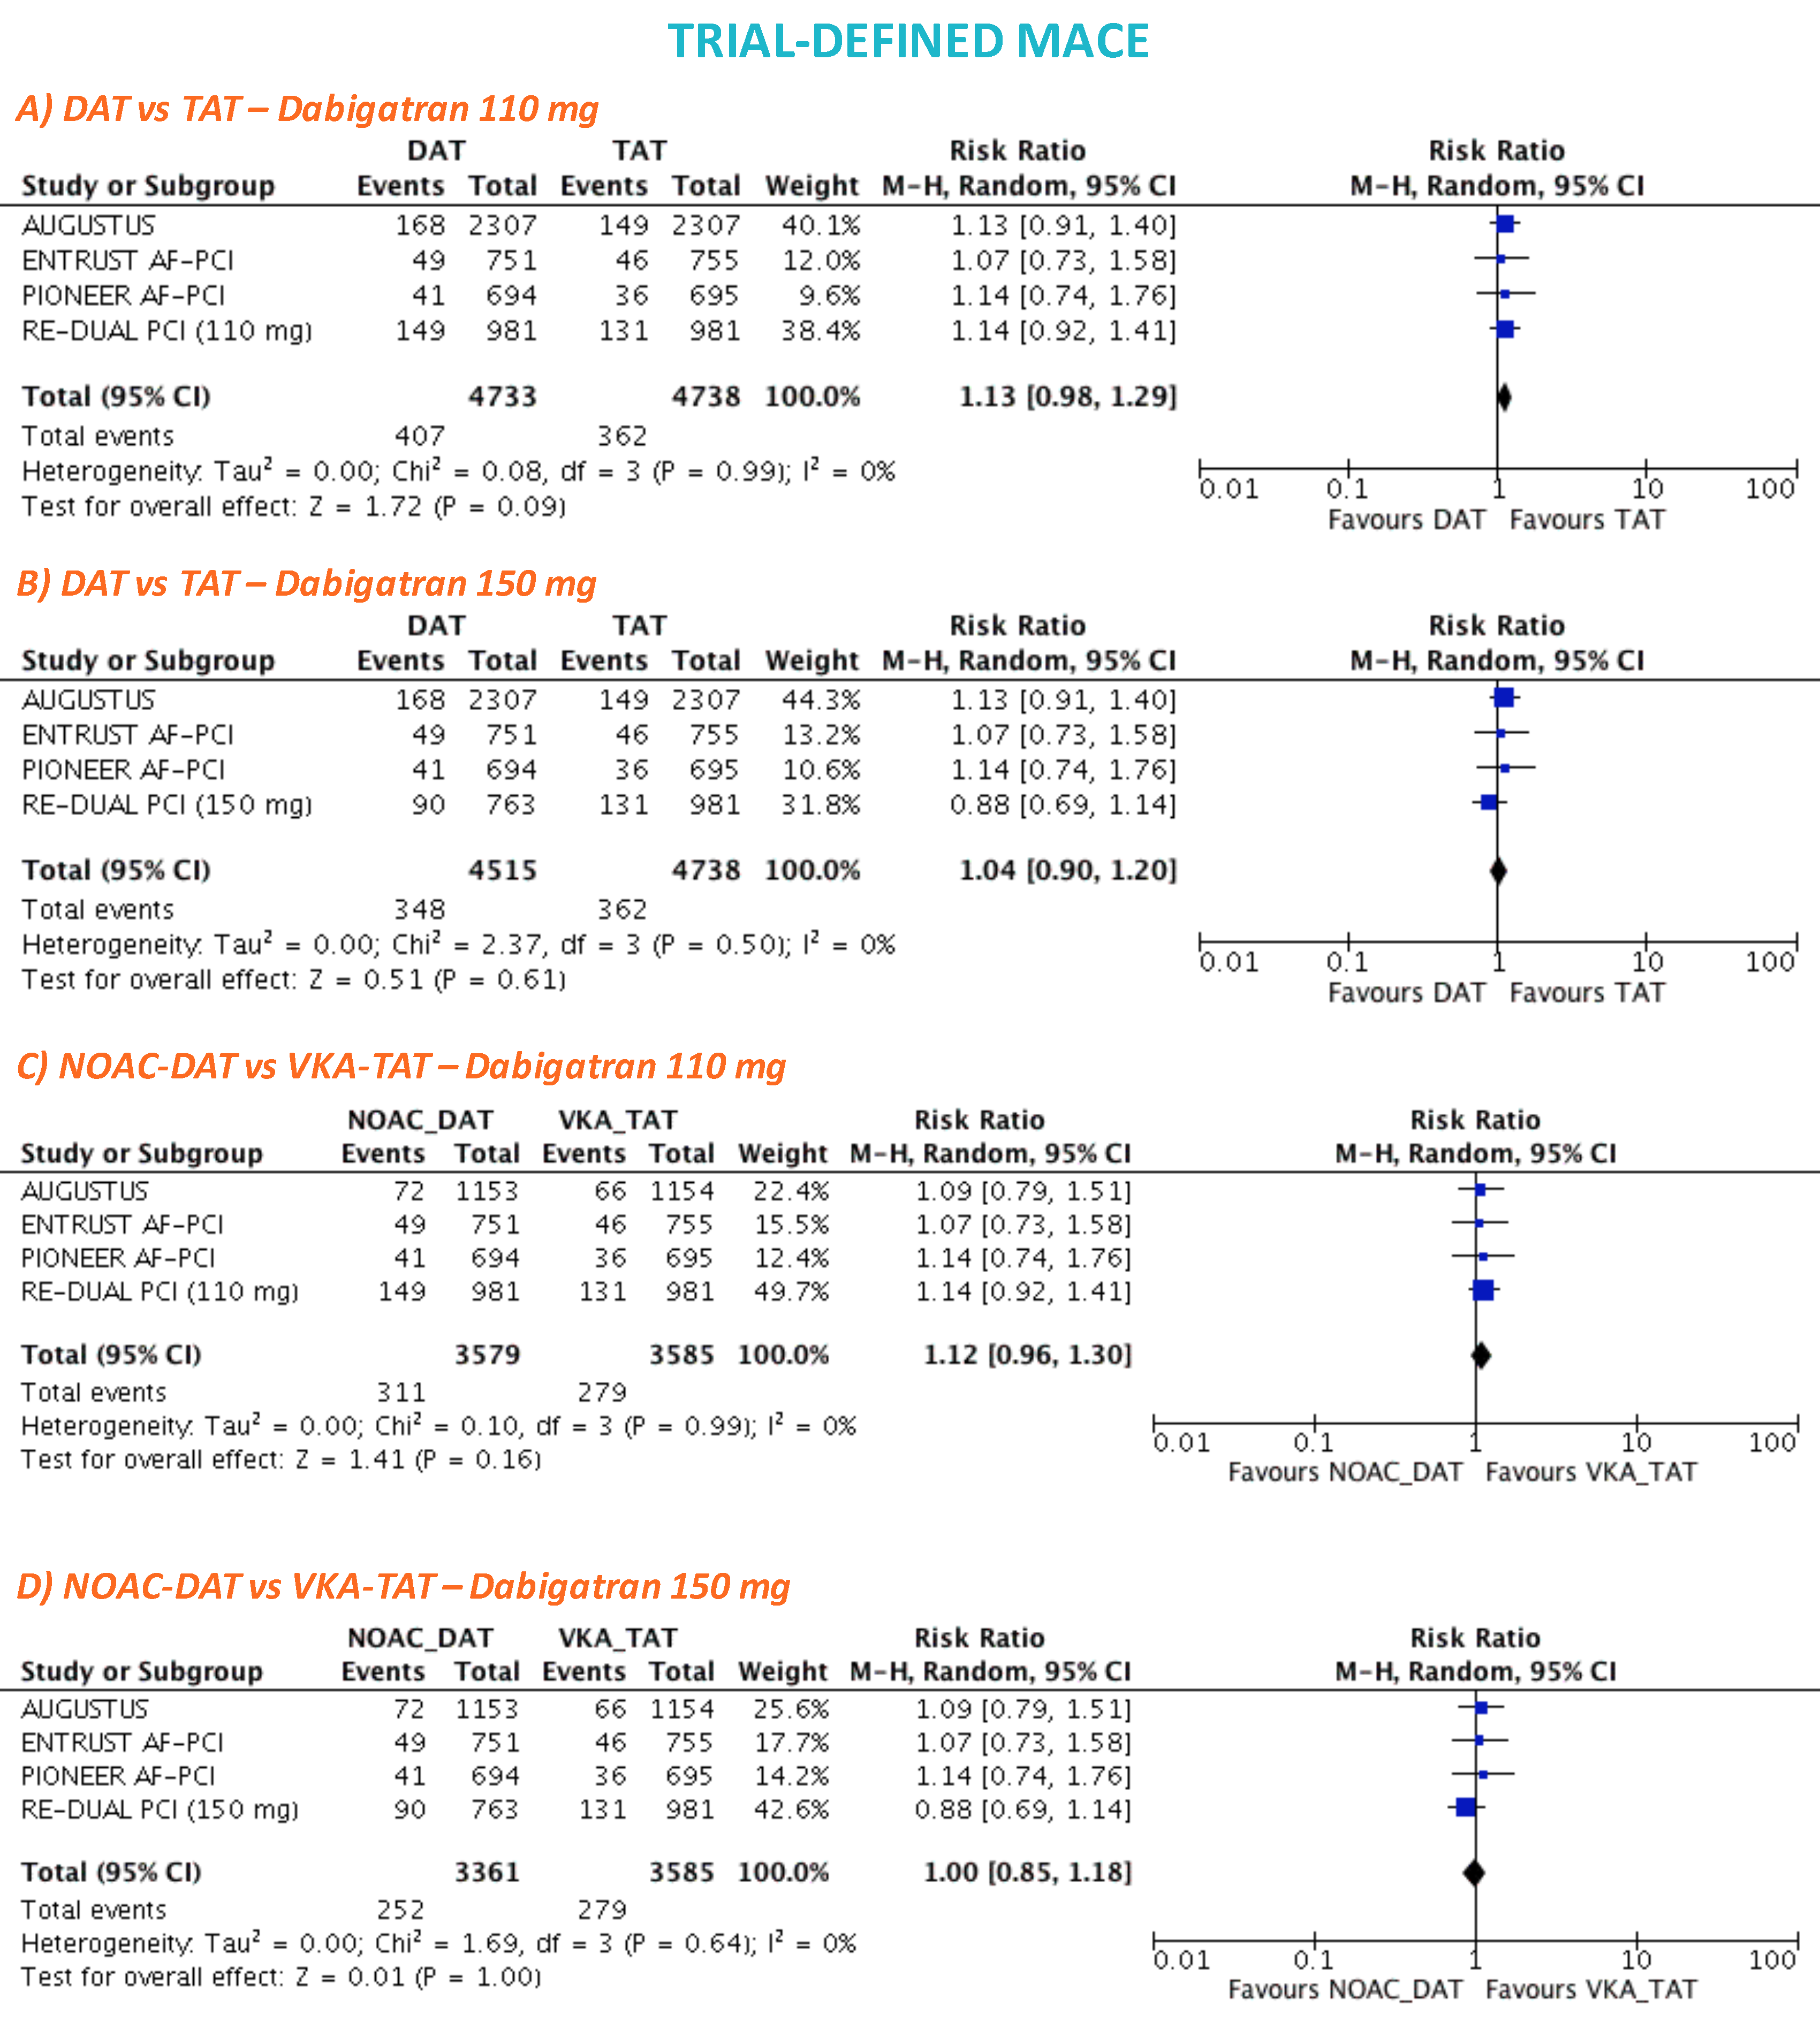
**

**Supplementary Figure 13. Stroke in DAT vs TAT and in NOAC-based DAT vs VKA-based TAT according to dabigatran doses.**

**
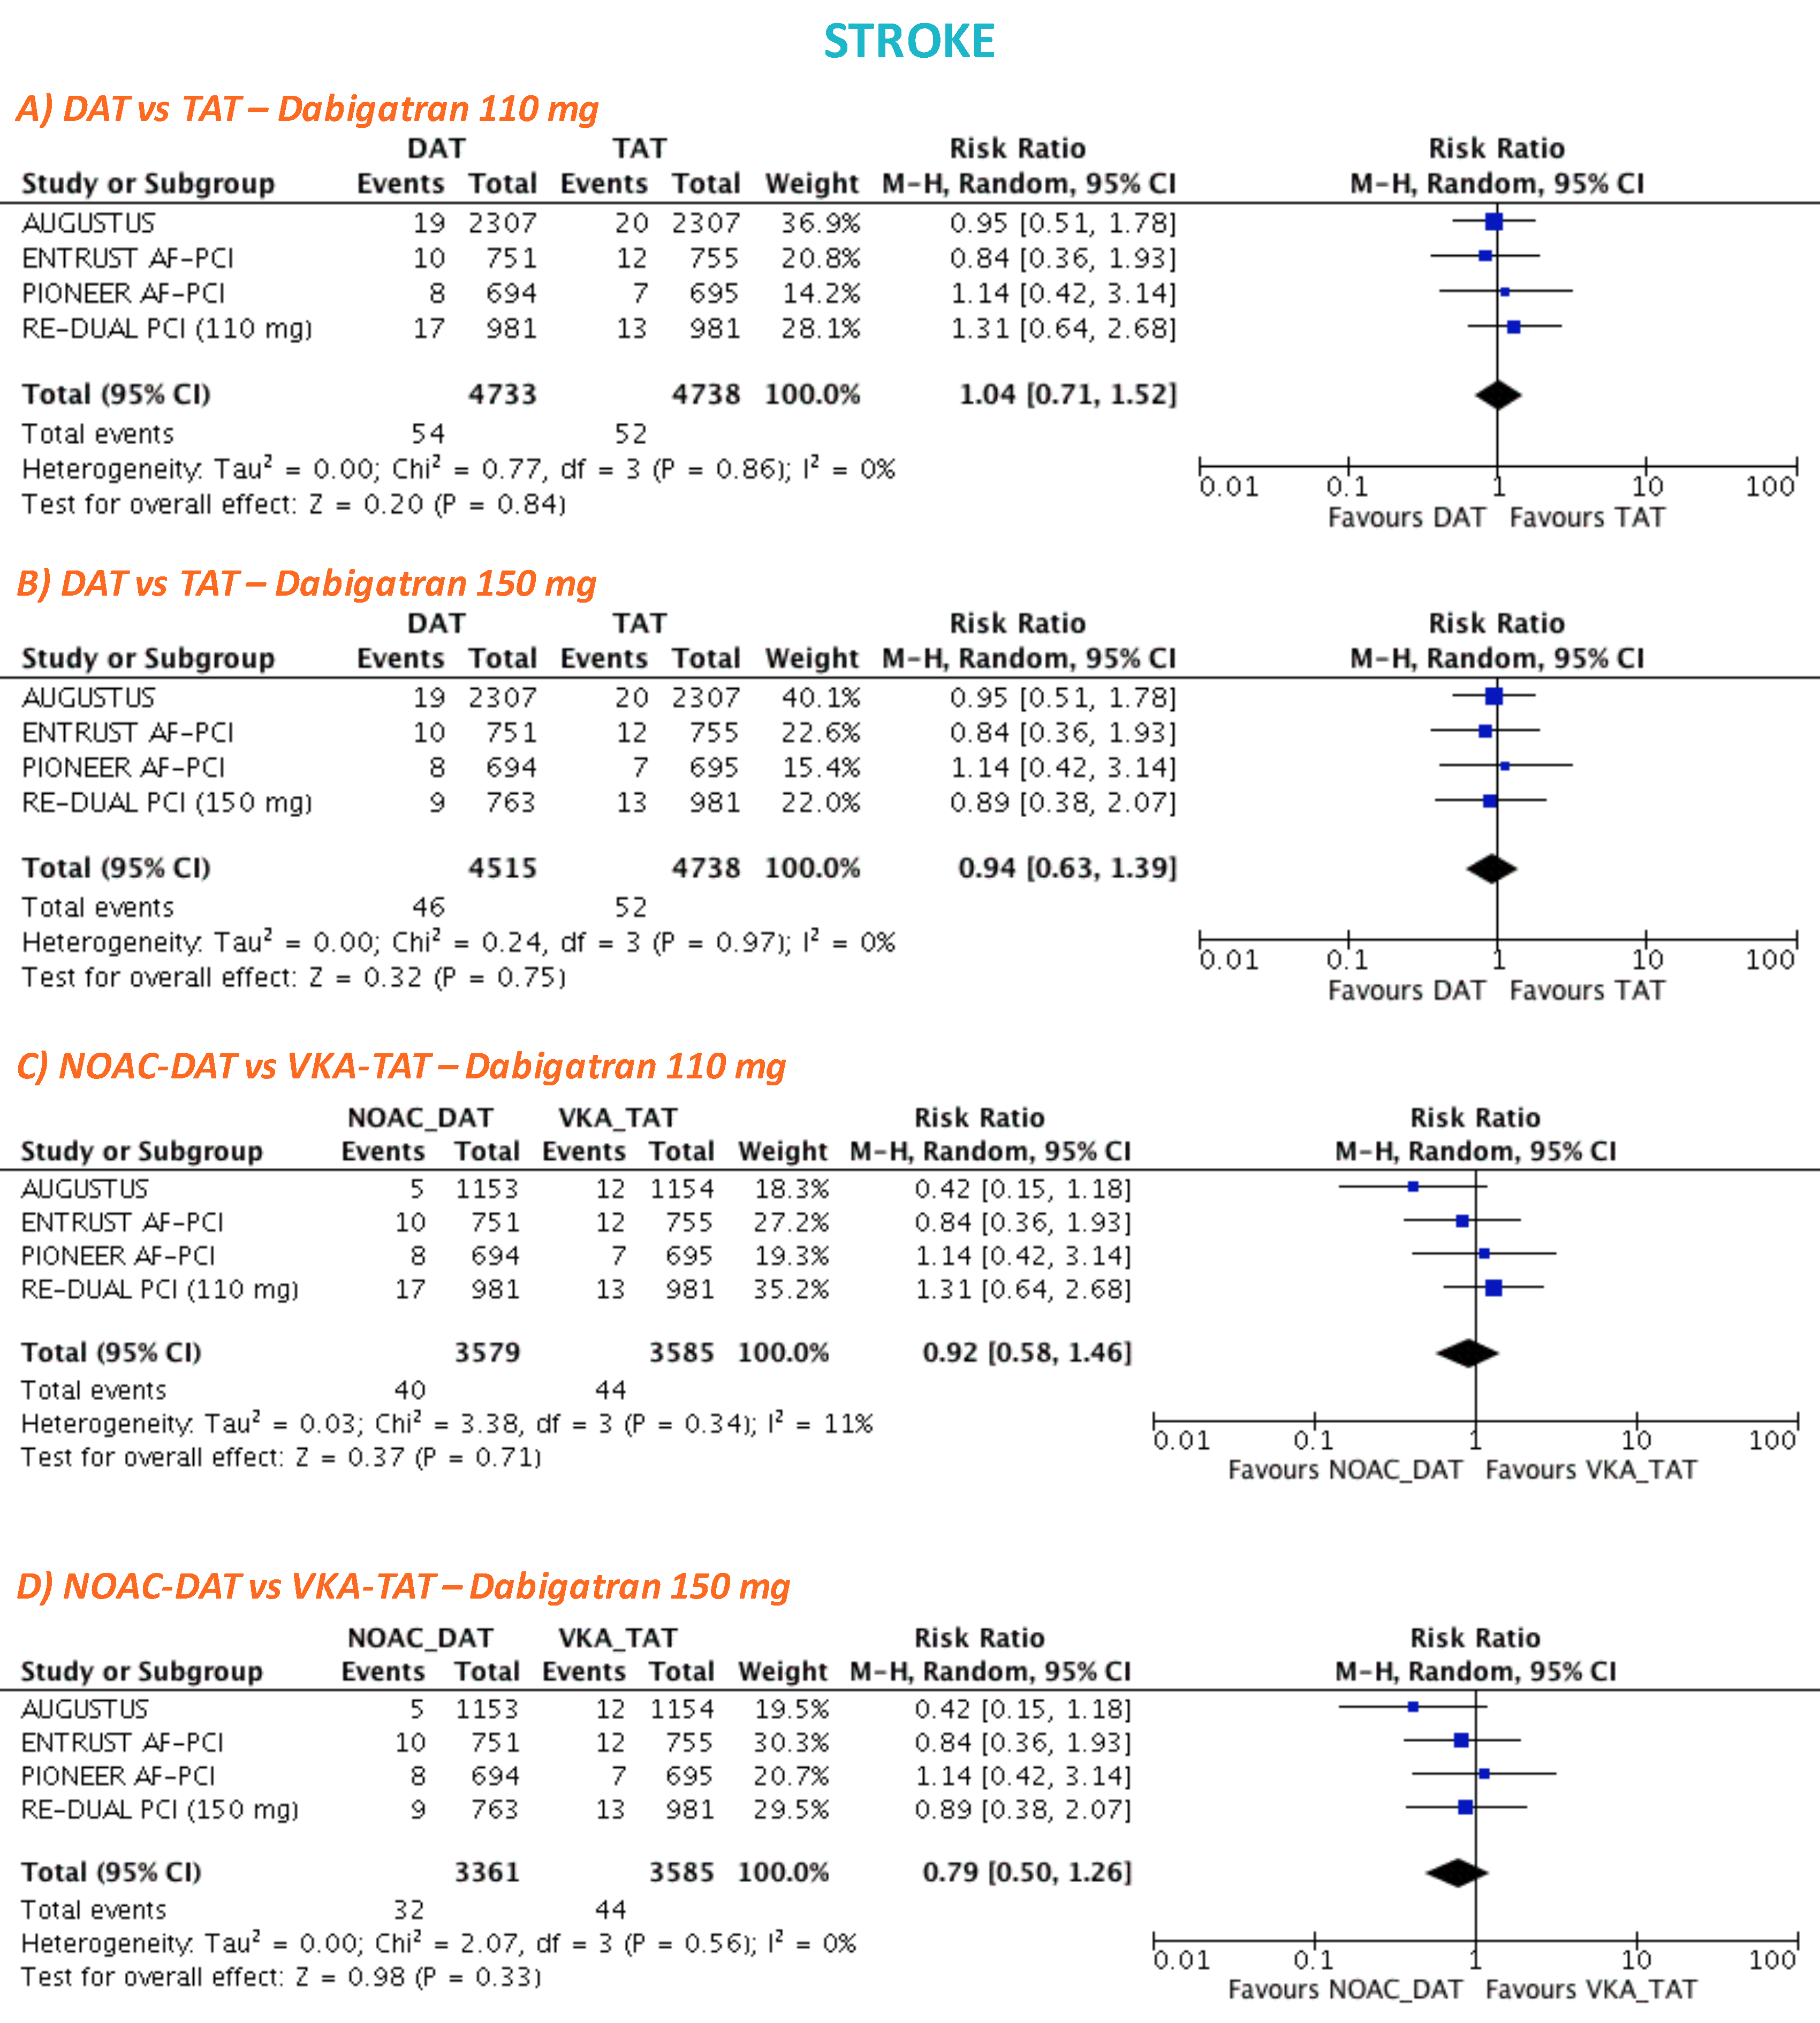
**

**Supplementary Figure 14. Myocardial infarction in DAT vs TAT and in NOAC-based DAT vs VKA-based TAT according to dabigatran doses.**

**
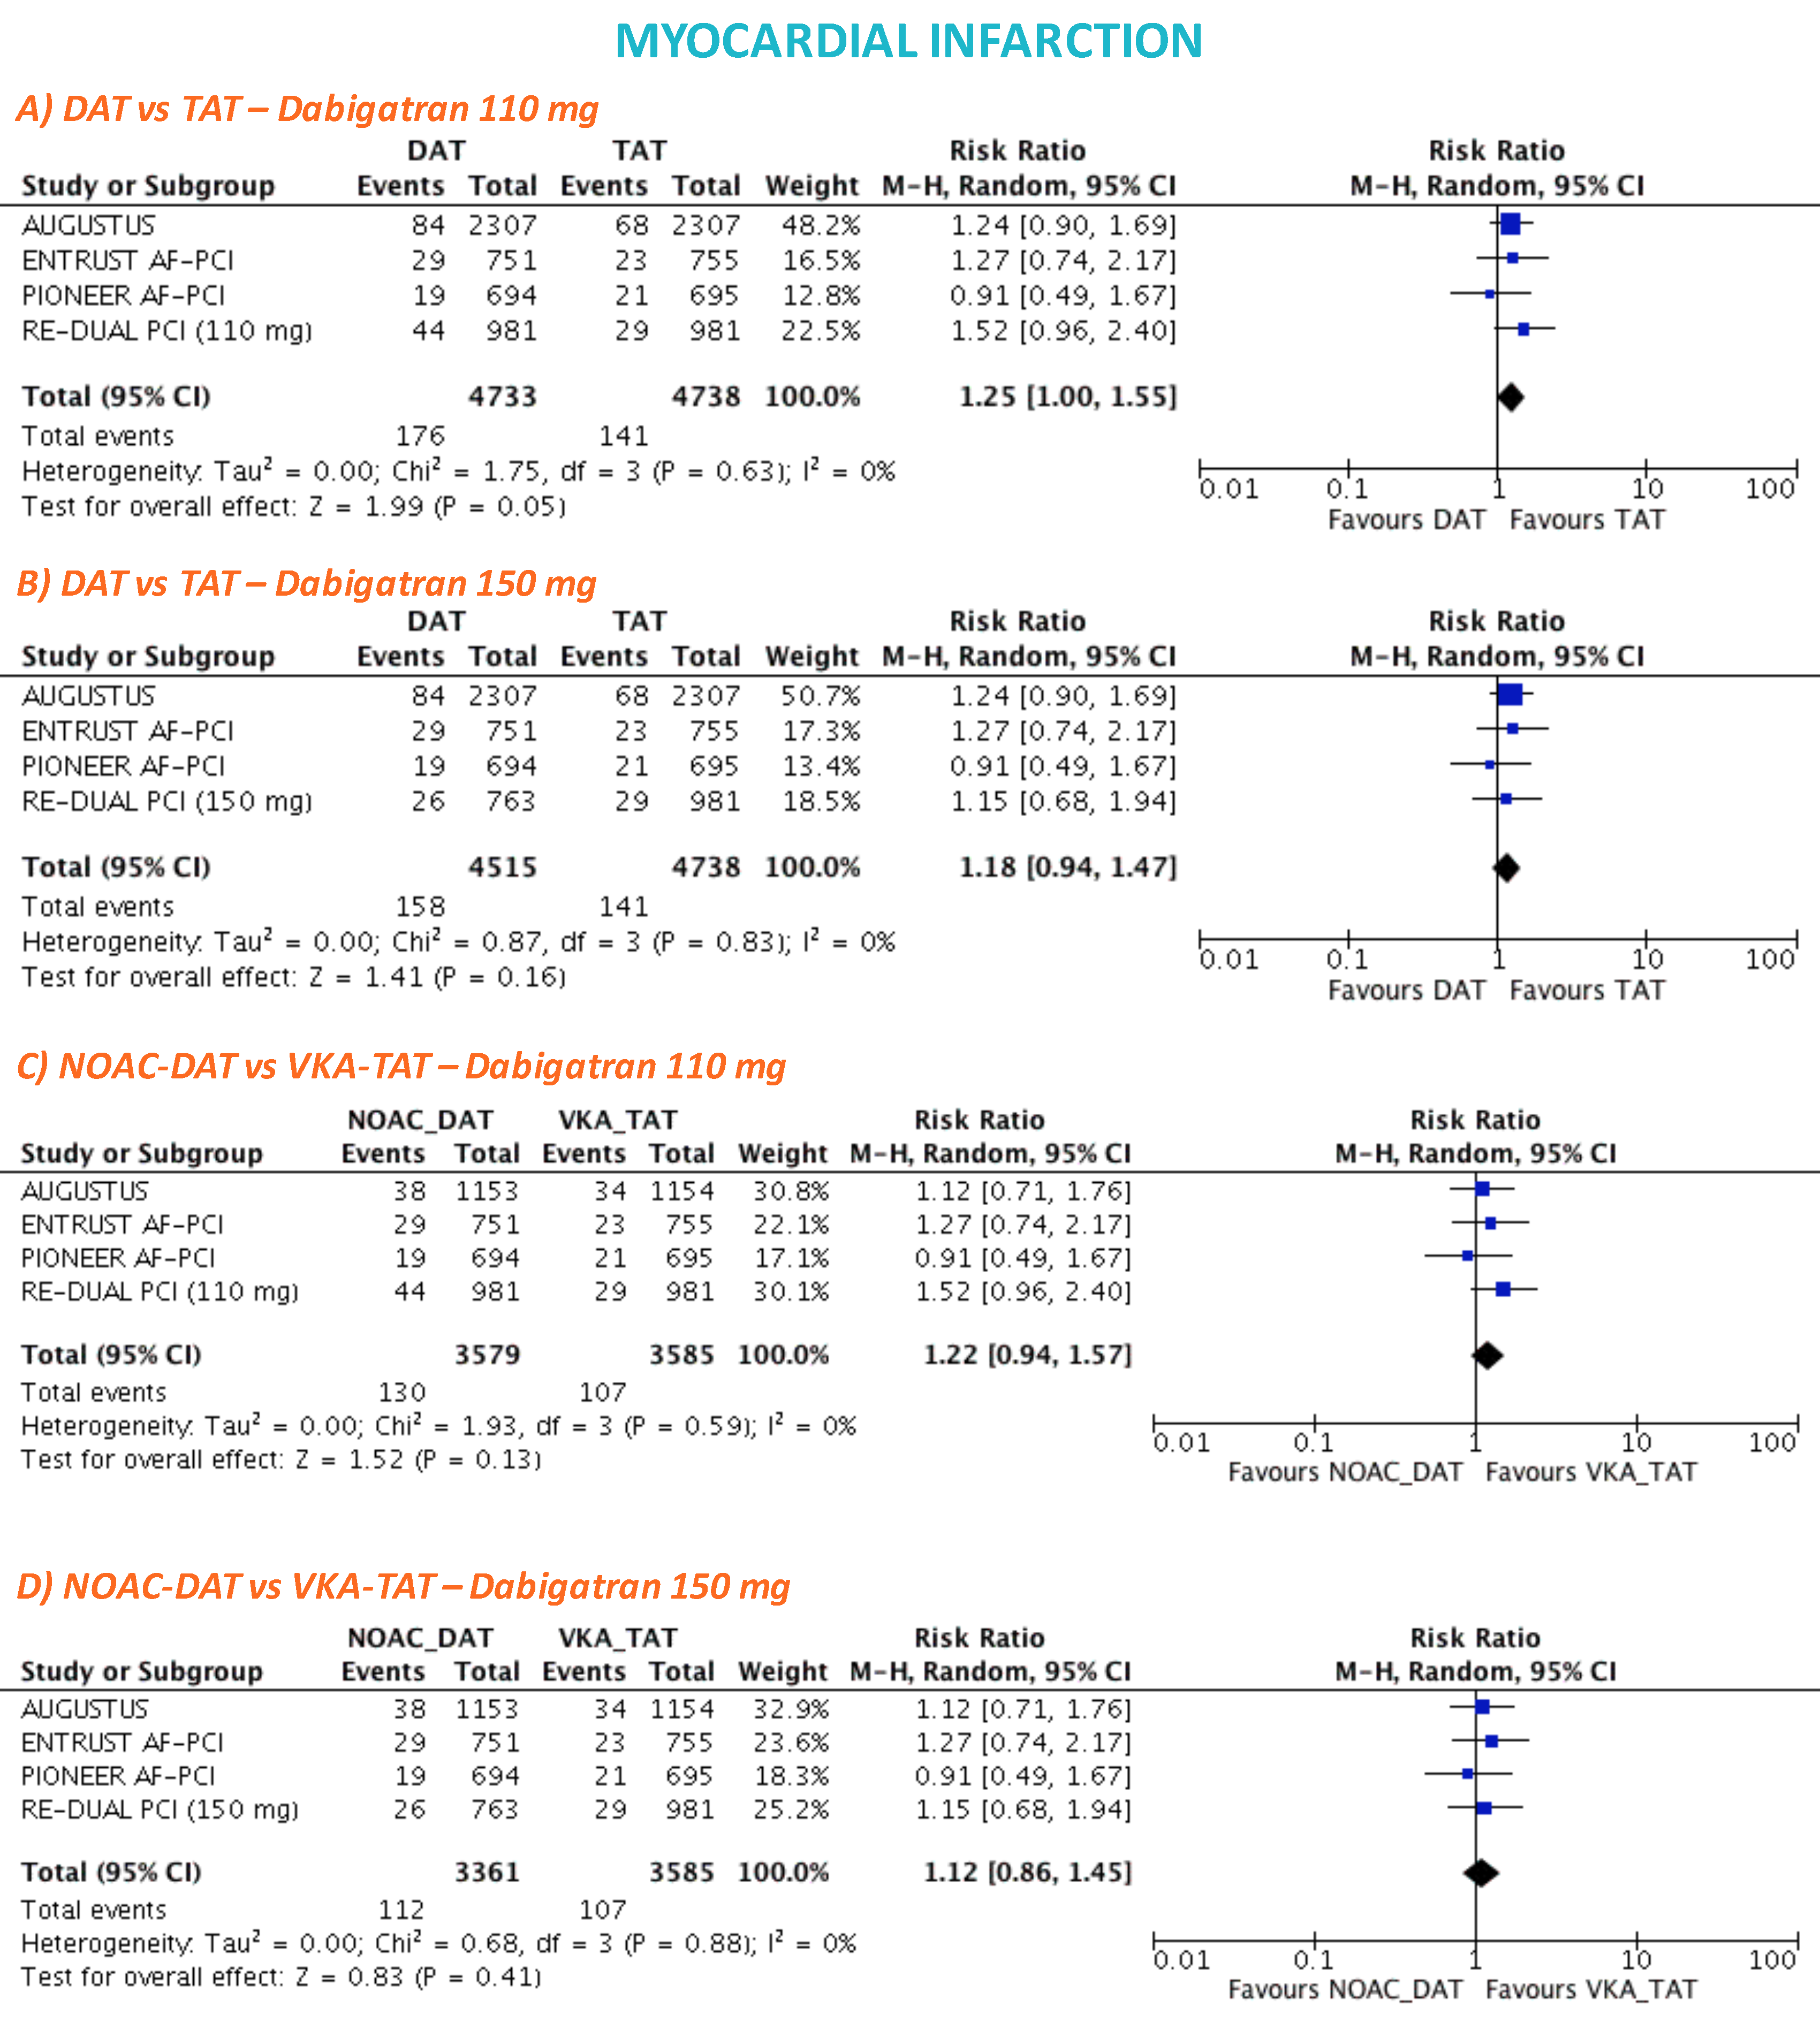
**

**Supplementary Figure 15. Stent thrombosis in DAT vs TAT and in NOAC-based DAT vs VKA-based TAT according to dabigatran doses.**

**
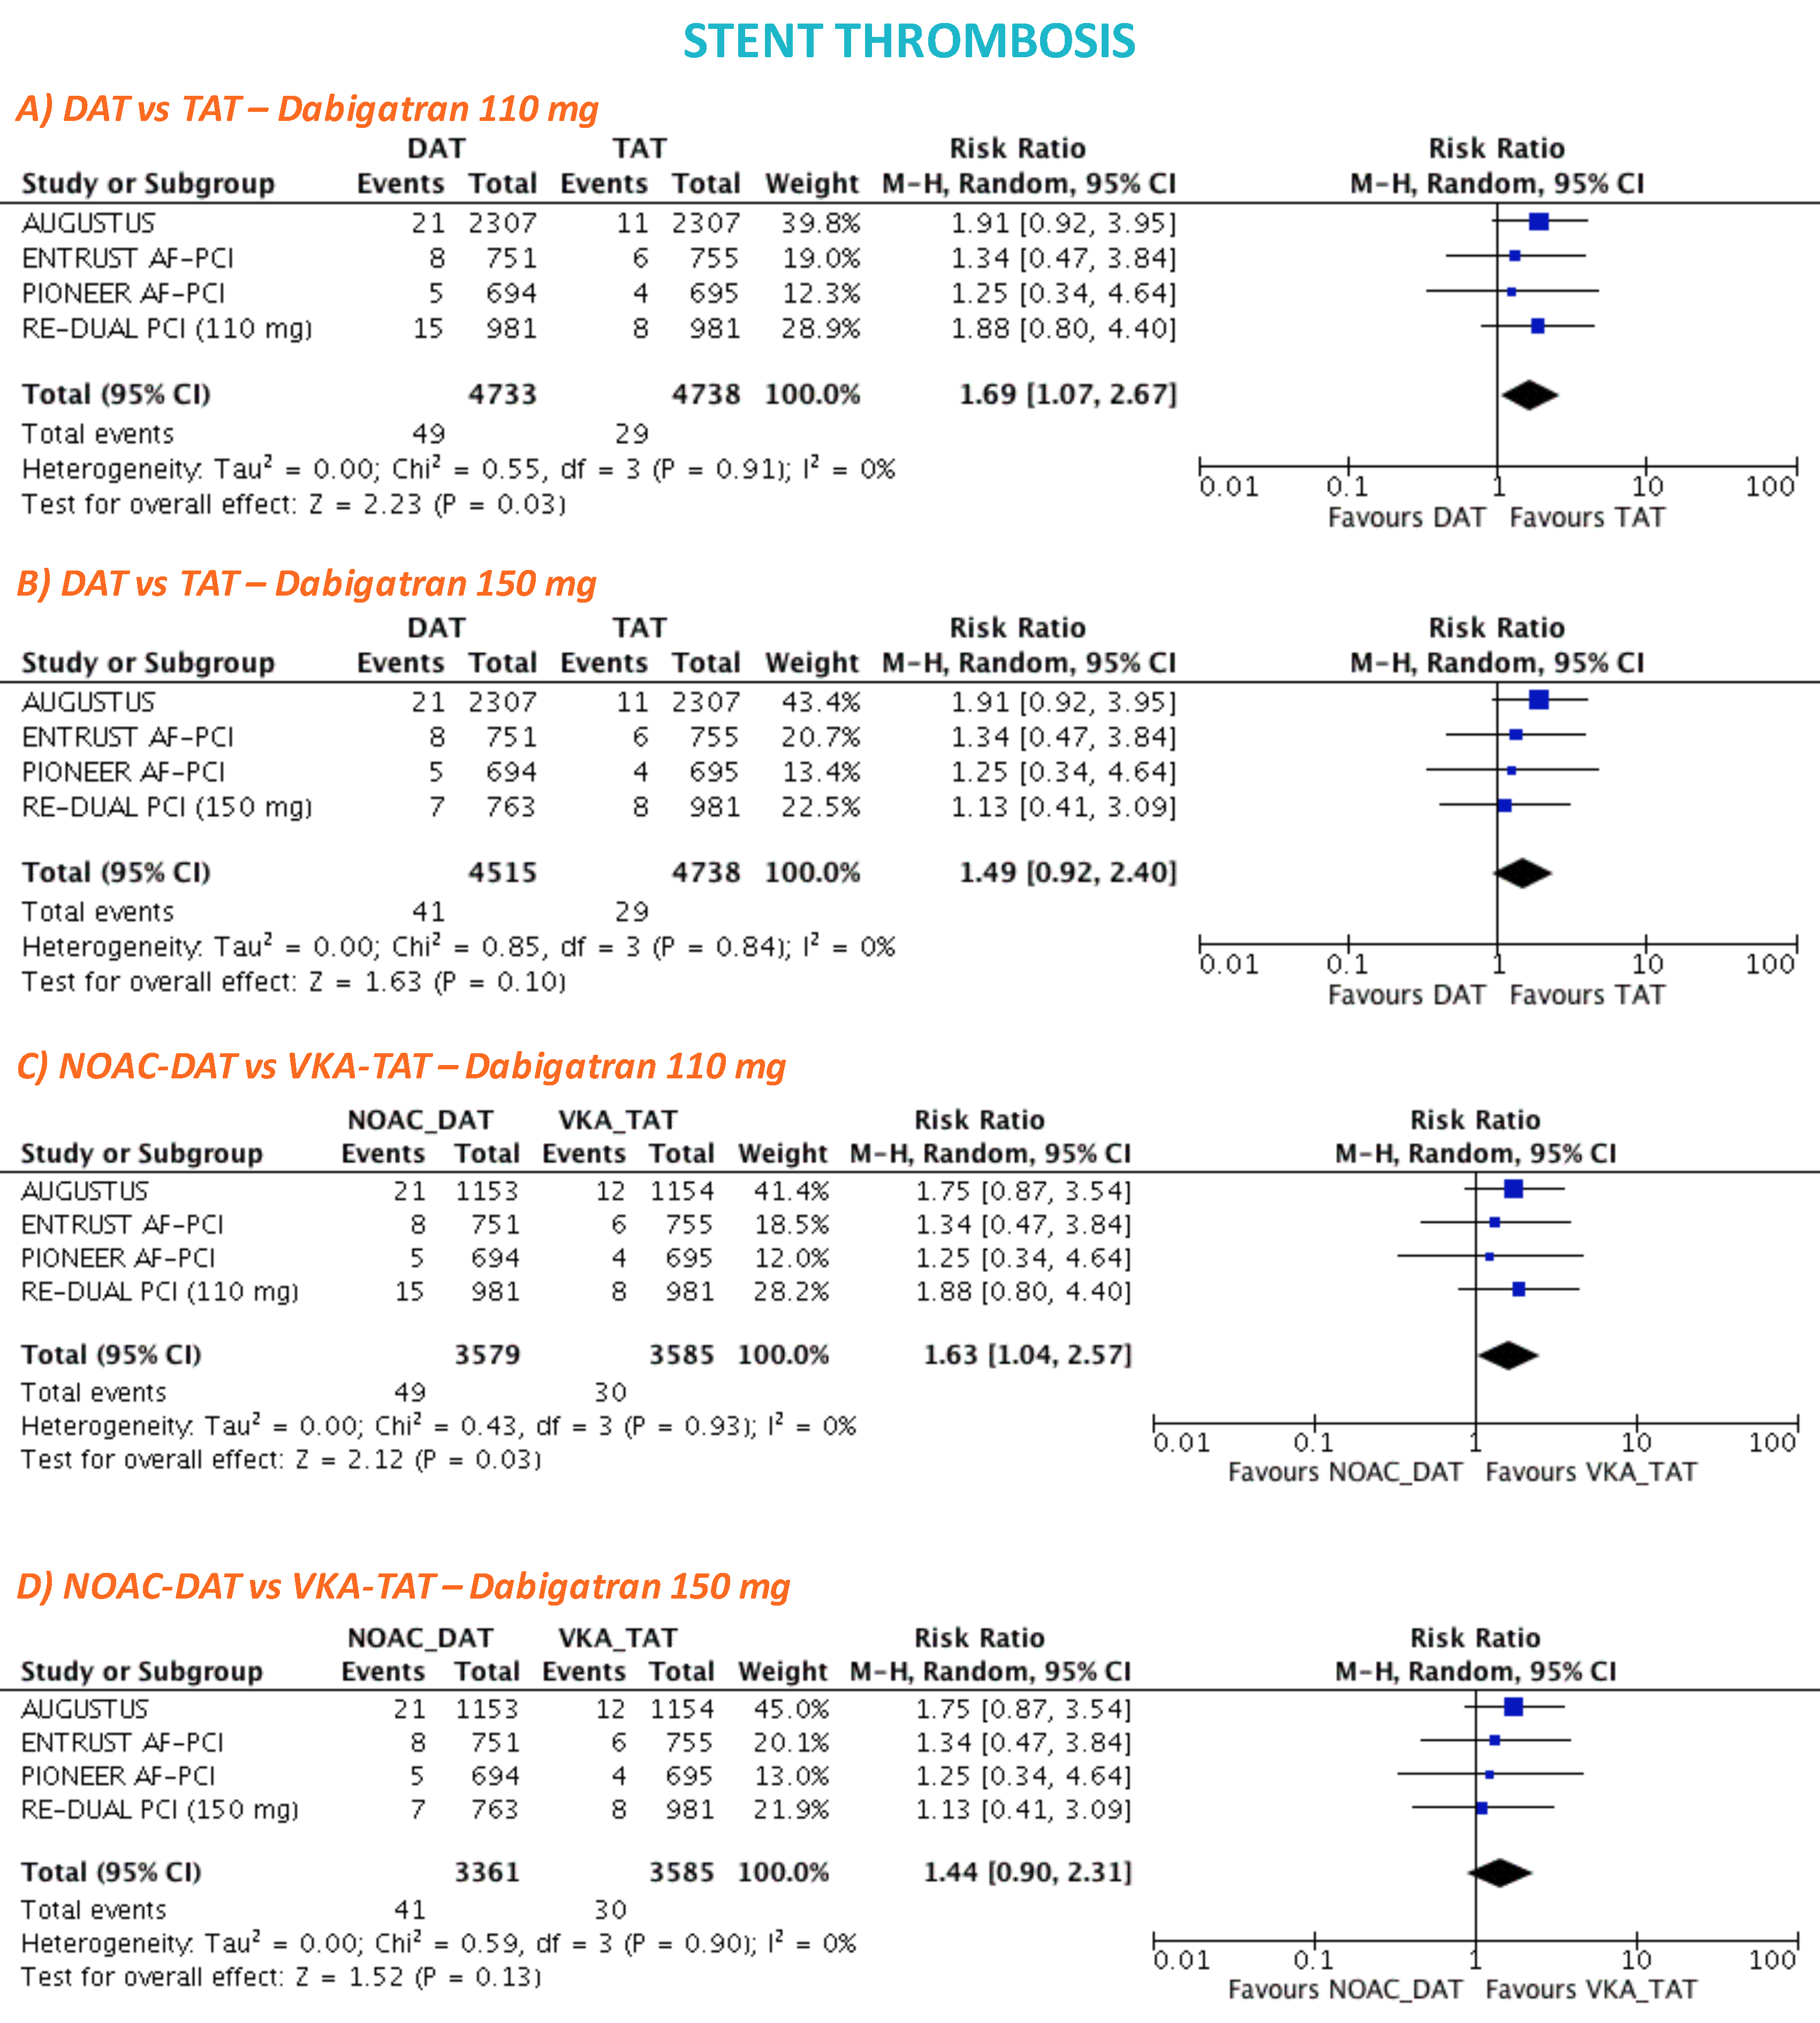
**

**Supplementary Figure 16. Summary of bleeding and ischemic endpoints in NOAC-DAT vs VKA-TAT.**


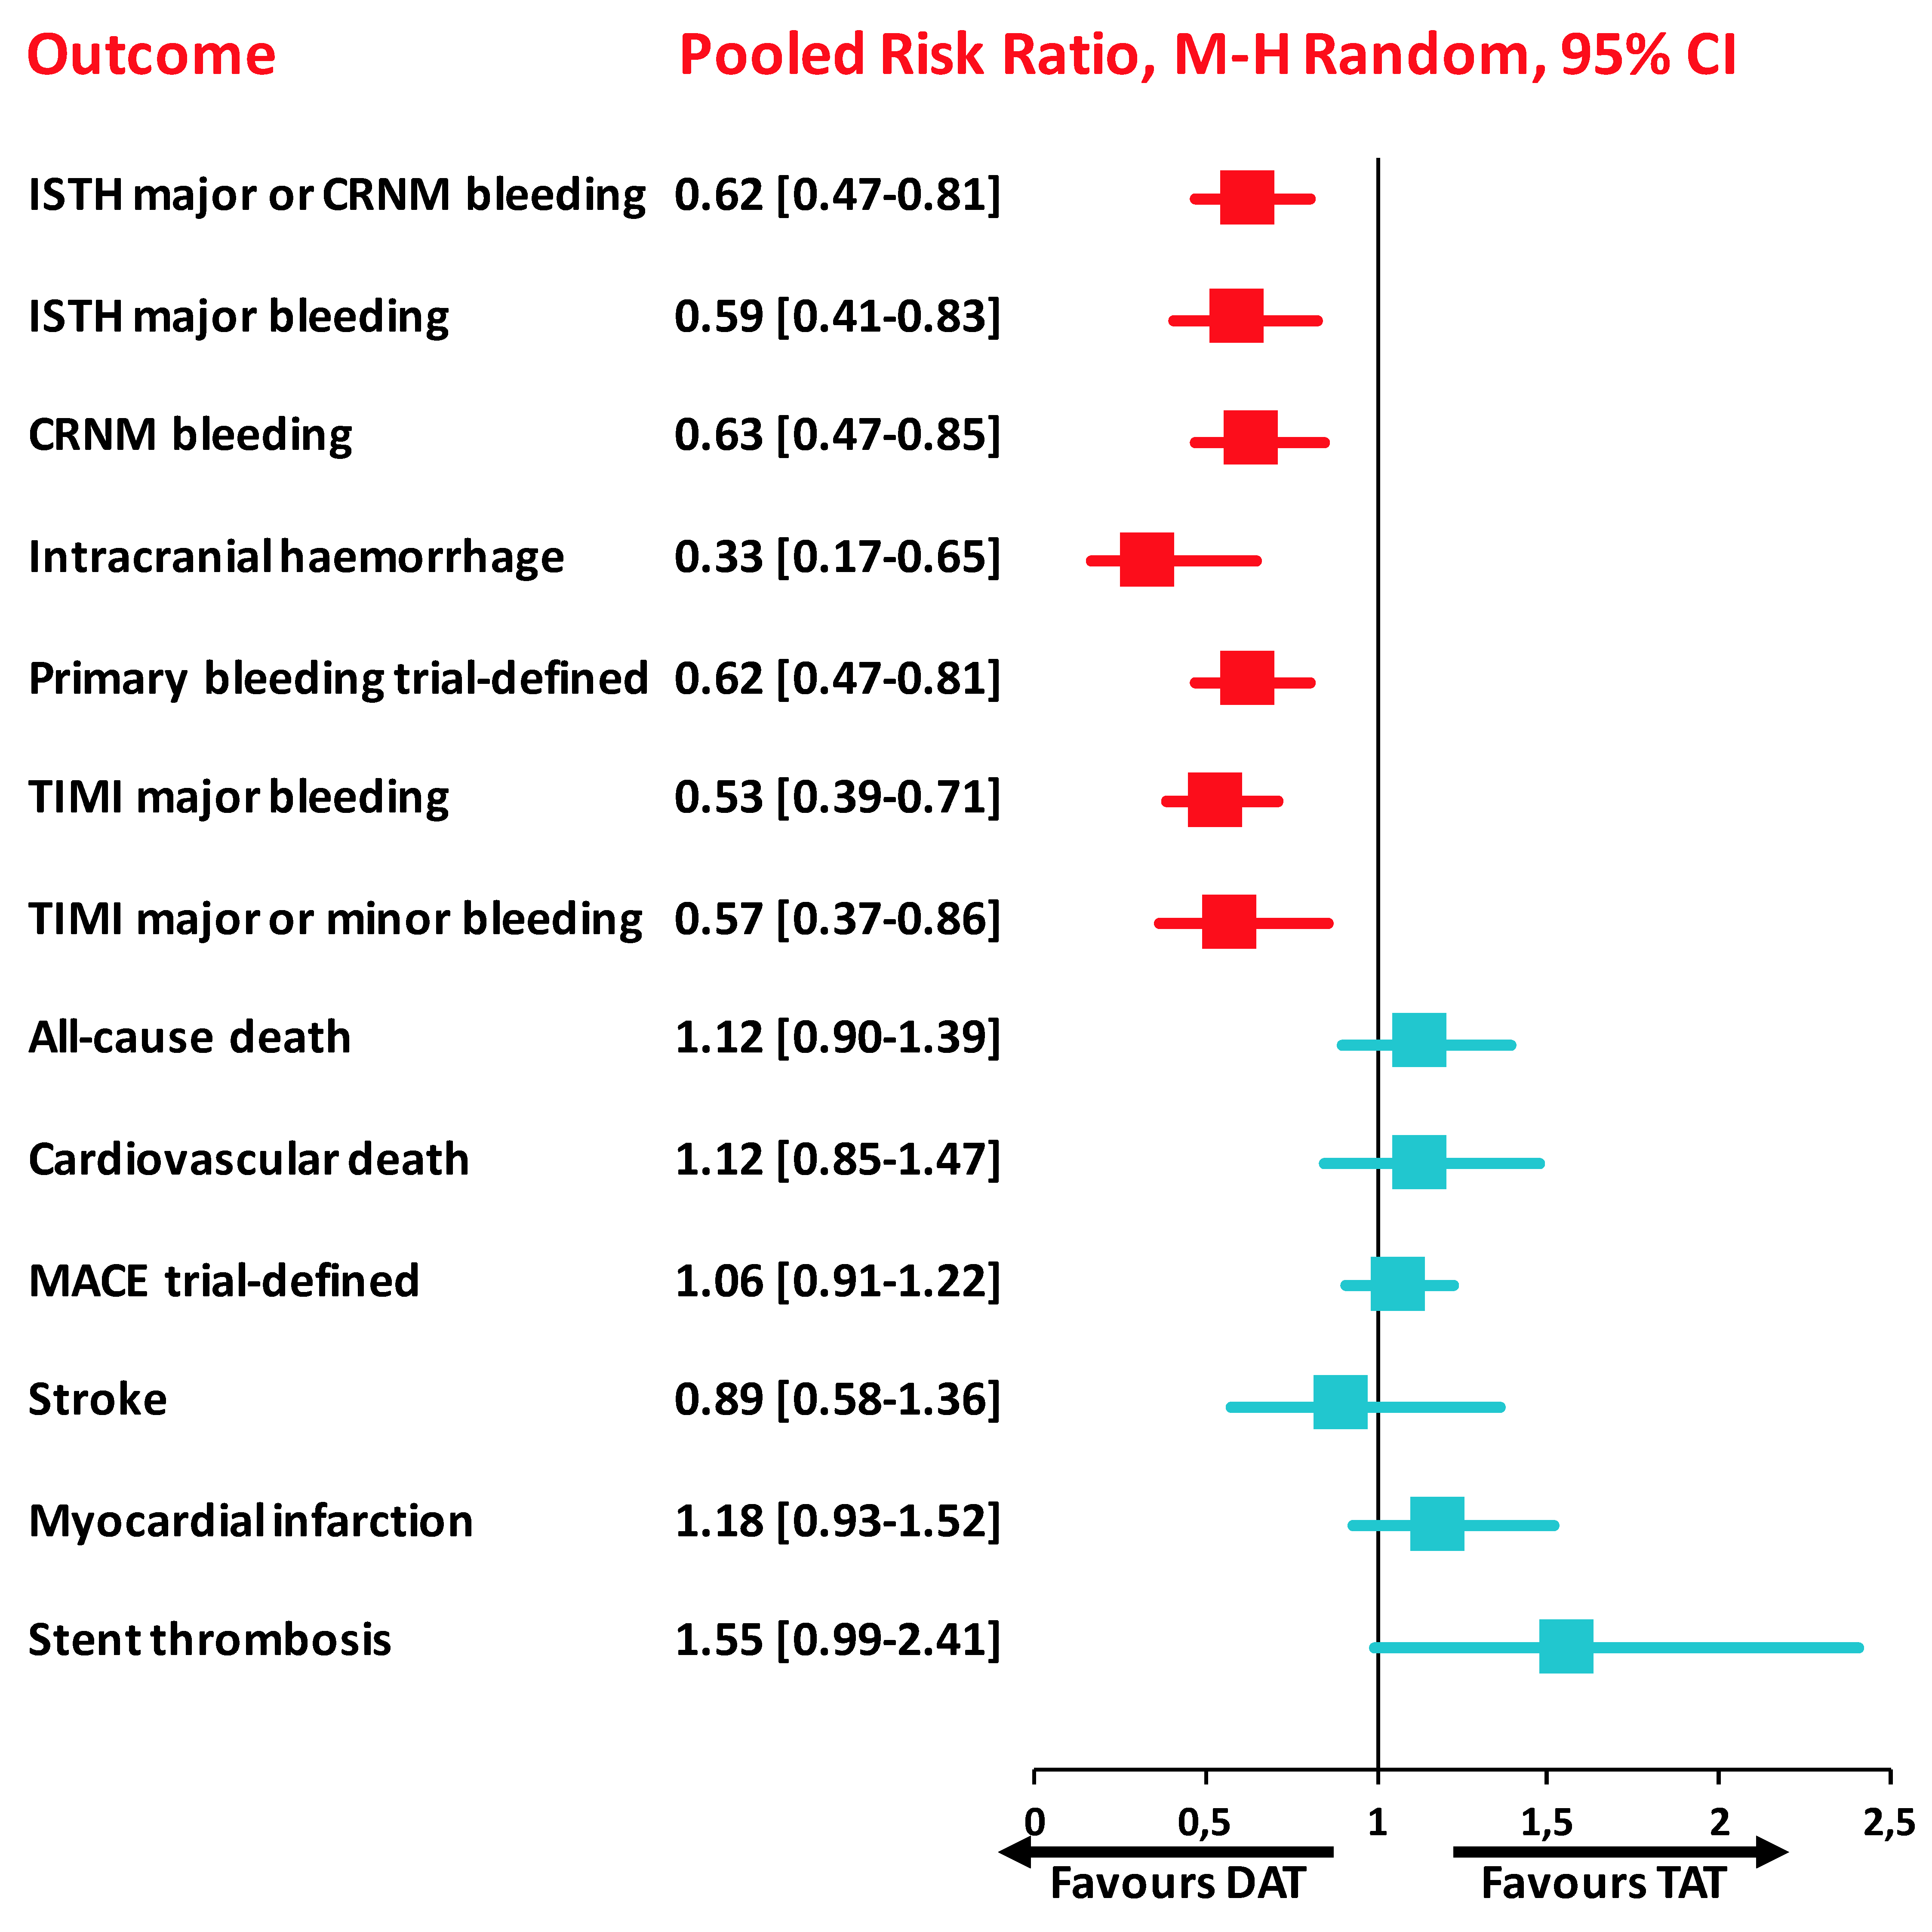

Supplement: eurheartj_40_46_3757_s10.docx [file eurheartj_40_46_3757_s10.docx]
